# Supplementary material for: Global Transcriptome Analyses Reveal Differentially Expressed Genes of Six Organs and Putative Genes Involved in (Iso)flavonoid Biosynthesis in Belamcanda chinensis
Source: Front Plant Sci. 2018 Aug 14;9:1160. doi: 10.3389/fpls.2018.01160 (PMC6102373; doi:10.3389/fpls.2018.01160)
Supplement: Supplementary file 4 [file Table_4.XLSX]

## Sheet: GO
Supplementary Table 4 Gene Ontology annotation of B.chinensis
Total annotated genes: 104,946
GO ID (Lev2)	GO Term (Lev2)	GO Term (Lev1)	Gene Number
GO:0009987	cellular process	Biological Process	55883
GO:0008152	metabolic process	Biological Process	52548
GO:0005488	binding	Molecular Function	50283
GO:0003824	catalytic activity	Molecular Function	41895
GO:0044699	single-organism process	Biological Process	40541
GO:0005623	cell	Cellular Component	31740
GO:0044464	cell part	Cellular Component	31719
GO:0043226	organelle	Cellular Component	21017
GO:0032991	macromolecular complex	Cellular Component	19773
GO:0065007	biological regulation	Biological Process	17418
GO:0016020	membrane	Cellular Component	16923
GO:0050789	regulation of biological process	Biological Process	16220
GO:0051179	localization	Biological Process	15346
GO:0044425	membrane part	Cellular Component	15324
GO:0071840	cellular component organization or biogenesis	Biological Process	11714
GO:0050896	response to stimulus	Biological Process	11499
GO:0044422	organelle part	Cellular Component	9864
GO:0005215	transporter activity	Molecular Function	6929
GO:0023052	signaling	Biological Process	6005
GO:0051704	multi-organism process	Biological Process	5712
GO:0005198	structural molecule activity	Molecular Function	4144
GO:0001071	nucleic acid binding transcription factor activity	Molecular Function	3006
GO:0031974	membrane-enclosed lumen	Cellular Component	2765
GO:0032501	multicellular organismal process	Biological Process	2483
GO:0098772	molecular function regulator	Molecular Function	2457
GO:0044423	virion part	Cellular Component	2225
GO:0019012	virion	Cellular Component	2225
GO:0032502	developmental process	Biological Process	2081
GO:0060089	molecular transducer activity	Molecular Function	1760
GO:0048518	positive regulation of biological process	Biological Process	1155
GO:0000003	reproduction	Biological Process	998
GO:0048519	negative regulation of biological process	Biological Process	997
GO:0000988	transcription factor activity, protein binding	Molecular Function	933
GO:0005576	extracellular region	Cellular Component	869
GO:0044217	other organism part	Cellular Component	848
GO:0044215	other organism	Cellular Component	848
GO:0040011	locomotion	Biological Process	823
GO:0022414	reproductive process	Biological Process	796
GO:0044421	extracellular region part	Cellular Component	745
GO:0002376	immune system process	Biological Process	721
GO:0016209	antioxidant activity	Molecular Function	577
GO:0022610	biological adhesion	Biological Process	544
GO:0031012	extracellular matrix	Cellular Component	317
GO:0007610	behavior	Biological Process	146
GO:0040007	growth	Biological Process	137
GO:0030054	cell junction	Cellular Component	104
GO:0001906	cell killing	Biological Process	94
GO:0044848	biological phase	Biological Process	76
GO:0048511	rhythmic process	Biological Process	54
GO:0016530	metallochaperone activity	Molecular Function	25
GO:0055044	symplast	Cellular Component	16
GO:0044420	extracellular matrix component	Cellular Component	12
GO:0009295	nucleoid	Cellular Component	11
GO:0098743	cell aggregation	Biological Process	5
GO:0045202	synapse	Cellular Component	5
GO:0044456	synapse part	Cellular Component	5

## Sheet: KOG
Supplementary Table 4 KOG annotation of B.chinensis
Class	Abbreviation	Gene Numbers
RNA processing and modification	A	2083
Chromatin structure and dynamics	B	566
Energy production and conversion	C	2794
Cell cycle control, cell division, chromosome partitioning	D	803
Amino acid transport and metabolism	E	1890
Nucleotide transport and metabolism	F	593
Carbohydrate transport and metabolism	G	1834
Coenzyme transport and metabolism	H	679
Lipid transport and metabolism	I	1647
Translation, ribosomal structure and biogenesis	J	4946
Transcription	K	1482
Replication, recombination and repair	L	696
Cell wall/membrane/envelope biogenesis	M	357
Cell motility	N	23
Posttranslational modification, protein turnover, chaperones	O	5722
Inorganic ion transport and metabolism	P	808
Secondary metabolites biosynthesis, transport and catabolism	Q	588
General function prediction only	R	3702
Function unknown	S	1180
Signal transduction mechanisms	T	2371
Intracellular trafficking, secretion, and vesicular transport	U	2505
Defense mechanisms	V	146
Extracellular structures	W	45
Unamed protein	X	1
Nuclear structure	Y	170
Cytoskeleton	Z	1284

## Sheet: KEGG
Supplementary Table 4 Number of unigenes assigned to 131 KEGG pathways.
Pathway Hierarchy1	Pathway Hierarchy2	KEGG Pathway	Pathway ID	Gene Number
Cellular Processes	Transport and catabolism	Endocytosis	ko04144	1225
Cellular Processes	Transport and catabolism	Peroxisome	ko04146	766
Cellular Processes	Transport and catabolism	Phagosome	ko04145	975
Cellular Processes	Transport and catabolism	Regulation of autophagy	ko04140	275
Environmental Information Processing	Membrane transport	ABC transporters	ko02010	279
Environmental Information Processing	Signal transduction	Phosphatidylinositol signaling system	ko04070	434
Environmental Information Processing	Signal transduction	Plant hormone signal transduction	ko04075	966
Genetic Information Processing	Folding, sorting and degradation	Proteasome	ko03050	604
Genetic Information Processing	Folding, sorting and degradation	Protein export	ko03060	344
Genetic Information Processing	Folding, sorting and degradation	Protein processing in endoplasmic reticulum	ko04141	1862
Genetic Information Processing	Folding, sorting and degradation	RNA degradation	ko03018	793
Genetic Information Processing	Folding, sorting and degradation	SNARE interactions in vesicular transport	ko04130	166
Genetic Information Processing	Folding, sorting and degradation	Sulfur relay system	ko04122	48
Genetic Information Processing	Folding, sorting and degradation	Ubiquitin mediated proteolysis	ko04120	935
Genetic Information Processing	Replication and repair	Base excision repair	ko03410	151
Genetic Information Processing	Replication and repair	DNA replication	ko03030	198
Genetic Information Processing	Replication and repair	Homologous recombination	ko03440	142
Genetic Information Processing	Replication and repair	Mismatch repair	ko03430	143
Genetic Information Processing	Replication and repair	Non-homologous end-joining	ko03450	30
Genetic Information Processing	Replication and repair	Nucleotide excision repair	ko03420	258
Genetic Information Processing	Transcription	Basal transcription factors	ko03022	188
Genetic Information Processing	Transcription	RNA polymerase	ko03020	216
Genetic Information Processing	Transcription	Spliceosome	ko03040	1383
Genetic Information Processing	Translation	Aminoacyl-tRNA biosynthesis	ko00970	444
Genetic Information Processing	Translation	RNA transport	ko03013	1336
Genetic Information Processing	Translation	Ribosome	ko03010	3016
Genetic Information Processing	Translation	Ribosome biogenesis in eukaryotes	ko03008	537
Genetic Information Processing	Translation	mRNA surveillance pathway	ko03015	869
Metabolism	Amino acid metabolism	Alanine, aspartate and glutamate metabolism	ko00250	518
Metabolism	Amino acid metabolism	Arginine and proline metabolism	ko00330	454
Metabolism	Amino acid metabolism	Arginine biosynthesis	ko00220	298
Metabolism	Amino acid metabolism	Cysteine and methionine metabolism	ko00270	810
Metabolism	Amino acid metabolism	Glycine, serine and threonine metabolism	ko00260	530
Metabolism	Amino acid metabolism	Histidine metabolism	ko00340	175
Metabolism	Amino acid metabolism	Lysine biosynthesis	ko00300	71
Metabolism	Amino acid metabolism	Lysine degradation	ko00310	260
Metabolism	Amino acid metabolism	Phenylalanine metabolism	ko00360	336
Metabolism	Amino acid metabolism	Phenylalanine, tyrosine and tryptophan biosynthesis	ko00400	274
Metabolism	Amino acid metabolism	Tryptophan metabolism	ko00380	292
Metabolism	Amino acid metabolism	Tyrosine metabolism	ko00350	283
Metabolism	Amino acid metabolism	Valine, leucine and isoleucine biosynthesis	ko00290	135
Metabolism	Amino acid metabolism	Valine, leucine and isoleucine degradation	ko00280	494
Metabolism	Biosynthesis of other secondary metabolites	Anthocyanin biosynthesis	ko00942	17
Metabolism	Biosynthesis of other secondary metabolites	Benzoxazinoid biosynthesis	ko00402	1
Metabolism	Biosynthesis of other secondary metabolites	Betalain biosynthesis	ko00965	11
Metabolism	Biosynthesis of other secondary metabolites	Caffeine metabolism	ko00232	35
Metabolism	Biosynthesis of other secondary metabolites	Flavone and flavonol biosynthesis	ko00944	62
Metabolism	Biosynthesis of other secondary metabolites	Flavonoid biosynthesis	ko00941	192
Metabolism	Biosynthesis of other secondary metabolites	Glucosinolate biosynthesis	ko00966	33
Metabolism	Biosynthesis of other secondary metabolites	Indole alkaloid biosynthesis	ko00901	2
Metabolism	Biosynthesis of other secondary metabolites	Isoflavonoid biosynthesis	ko00943	14
Metabolism	Biosynthesis of other secondary metabolites	Isoquinoline alkaloid biosynthesis	ko00950	153
Metabolism	Biosynthesis of other secondary metabolites	Monobactam biosynthesis	ko00261	101
Metabolism	Biosynthesis of other secondary metabolites	Phenylpropanoid biosynthesis	ko00940	762
Metabolism	Biosynthesis of other secondary metabolites	Stilbenoid, diarylheptanoid and gingerol biosynthesis	ko00945	172
Metabolism	Biosynthesis of other secondary metabolites	Tropane, piperidine and pyridine alkaloid biosynthesis	ko00960	153
Metabolism	Carbohydrate metabolism	Amino sugar and nucleotide sugar metabolism	ko00520	835
Metabolism	Carbohydrate metabolism	Ascorbate and aldarate metabolism	ko00053	335
Metabolism	Carbohydrate metabolism	Butanoate metabolism	ko00650	188
Metabolism	Carbohydrate metabolism	C5-Branched dibasic acid metabolism	ko00660	52
Metabolism	Carbohydrate metabolism	Citrate cycle (TCA cycle)	ko00020	763
Metabolism	Carbohydrate metabolism	Fructose and mannose metabolism	ko00051	455
Metabolism	Carbohydrate metabolism	Galactose metabolism	ko00052	372
Metabolism	Carbohydrate metabolism	Glycolysis / Gluconeogenesis	ko00010	1123
Metabolism	Carbohydrate metabolism	Glyoxylate and dicarboxylate metabolism	ko00630	799
Metabolism	Carbohydrate metabolism	Inositol phosphate metabolism	ko00562	409
Metabolism	Carbohydrate metabolism	Pentose and glucuronate interconversions	ko00040	498
Metabolism	Carbohydrate metabolism	Pentose phosphate pathway	ko00030	451
Metabolism	Carbohydrate metabolism	Propanoate metabolism	ko00640	285
Metabolism	Carbohydrate metabolism	Pyruvate metabolism	ko00620	911
Metabolism	Carbohydrate metabolism	Starch and sucrose metabolism	ko00500	1207
Metabolism	Energy metabolism	Carbon fixation in photosynthetic organisms	ko00710	793
Metabolism	Energy metabolism	Nitrogen metabolism	ko00910	280
Metabolism	Energy metabolism	Oxidative phosphorylation	ko00190	1311
Metabolism	Energy metabolism	Photosynthesis	ko00195	381
Metabolism	Energy metabolism	Photosynthesis - antenna proteins	ko00196	251
Metabolism	Energy metabolism	Sulfur metabolism	ko00920	220
Metabolism	Glycan biosynthesis and metabolism	Glycosaminoglycan degradation	ko00531	102
Metabolism	Glycan biosynthesis and metabolism	Glycosphingolipid biosynthesis - ganglio series	ko00604	59
Metabolism	Glycan biosynthesis and metabolism	Glycosphingolipid biosynthesis - globo series	ko00603	46
Metabolism	Glycan biosynthesis and metabolism	Glycosylphosphatidylinositol(GPI)-anchor biosynthesis	ko00563	89
Metabolism	Glycan biosynthesis and metabolism	N-Glycan biosynthesis	ko00510	242
Metabolism	Glycan biosynthesis and metabolism	Other glycan degradation	ko00511	139
Metabolism	Glycan biosynthesis and metabolism	Other types of O-glycan biosynthesis	ko00514	39
Metabolism	Lipid metabolism	Arachidonic acid metabolism	ko00590	111
Metabolism	Lipid metabolism	Biosynthesis of unsaturated fatty acids	ko01040	346
Metabolism	Lipid metabolism	Cutin, suberine and wax biosynthesis	ko00073	90
Metabolism	Lipid metabolism	Ether lipid metabolism	ko00565	160
Metabolism	Lipid metabolism	Fatty acid biosynthesis	ko00061	320
Metabolism	Lipid metabolism	Fatty acid degradation	ko00071	488
Metabolism	Lipid metabolism	Fatty acid elongation	ko00062	229
Metabolism	Lipid metabolism	Glycerolipid metabolism	ko00561	429
Metabolism	Lipid metabolism	Glycerophospholipid metabolism	ko00564	524
Metabolism	Lipid metabolism	Linoleic acid metabolism	ko00591	125
Metabolism	Lipid metabolism	Sphingolipid metabolism	ko00600	216
Metabolism	Lipid metabolism	Steroid biosynthesis	ko00100	230
Metabolism	Lipid metabolism	Synthesis and degradation of ketone bodies	ko00072	74
Metabolism	Lipid metabolism	alpha-Linolenic acid metabolism	ko00592	336
Metabolism	Metabolism of cofactors and vitamins	Biotin metabolism	ko00780	119
Metabolism	Metabolism of cofactors and vitamins	Folate biosynthesis	ko00790	58
Metabolism	Metabolism of cofactors and vitamins	Lipoic acid metabolism	ko00785	57
Metabolism	Metabolism of cofactors and vitamins	Nicotinate and nicotinamide metabolism	ko00760	94
Metabolism	Metabolism of cofactors and vitamins	One carbon pool by folate	ko00670	147
Metabolism	Metabolism of cofactors and vitamins	Pantothenate and CoA biosynthesis	ko00770	167
Metabolism	Metabolism of cofactors and vitamins	Porphyrin and chlorophyll metabolism	ko00860	324
Metabolism	Metabolism of cofactors and vitamins	Riboflavin metabolism	ko00740	52
Metabolism	Metabolism of cofactors and vitamins	Thiamine metabolism	ko00730	81
Metabolism	Metabolism of cofactors and vitamins	Ubiquinone and other terpenoid-quinone biosynthesis	ko00130	229
Metabolism	Metabolism of cofactors and vitamins	Vitamin B6 metabolism	ko00750	74
Metabolism	Metabolism of other amino acids	Cyanoamino acid metabolism	ko00460	286
Metabolism	Metabolism of other amino acids	Glutathione metabolism	ko00480	560
Metabolism	Metabolism of other amino acids	Selenocompound metabolism	ko00450	307
Metabolism	Metabolism of other amino acids	Taurine and hypotaurine metabolism	ko00430	54
Metabolism	Metabolism of other amino acids	beta-Alanine metabolism	ko00410	390
Metabolism	Metabolism of terpenoids and polyketides	Brassinosteroid biosynthesis	ko00905	87
Metabolism	Metabolism of terpenoids and polyketides	Carotenoid biosynthesis	ko00906	350
Metabolism	Metabolism of terpenoids and polyketides	Diterpenoid biosynthesis	ko00904	77
Metabolism	Metabolism of terpenoids and polyketides	Limonene and pinene degradation	ko00903	172
Metabolism	Metabolism of terpenoids and polyketides	Monoterpenoid biosynthesis	ko00902	16
Metabolism	Metabolism of terpenoids and polyketides	Sesquiterpenoid and triterpenoid biosynthesis	ko00909	59
Metabolism	Metabolism of terpenoids and polyketides	Terpenoid backbone biosynthesis	ko00900	347
Metabolism	Metabolism of terpenoids and polyketides	Zeatin biosynthesis	ko00908	201
Metabolism	Nucleotide metabolism	Purine metabolism	ko00230	1119
Metabolism	Nucleotide metabolism	Pyrimidine metabolism	ko00240	690
Metabolism	Overview	2-Oxocarboxylic acid metabolism	ko01210	476
Metabolism	Overview	Biosynthesis of amino acids	ko01230	2121
Metabolism	Overview	Carbon metabolism	ko01200	2565
Metabolism	Overview	Degradation of aromatic compounds	ko01220	75
Metabolism	Overview	Fatty acid metabolism	ko01212	703
Organismal Systems	Environmental adaptation	Circadian rhythm - plant	ko04712	324
Organismal Systems	Environmental adaptation	Plant-pathogen interaction	ko04626	1551
