# Supplementary material for: Global Transcriptome Analyses Reveal Differentially Expressed Genes of Six Organs and Putative Genes Involved in (Iso)flavonoid Biosynthesis in Belamcanda chinensis
Source: Front Plant Sci. 2018 Aug 14;9:1160. doi: 10.3389/fpls.2018.01160 (PMC6102373; doi:10.3389/fpls.2018.01160)
Supplement: Supplementary file 5 [file Table_5.XLSX]

## Sheet: Root
Supplementary Table 5 Top 15 Gene Ontology enrichment terms of up-regulated differentially expressed genes (DEGs) in root
Bg_list	104946
Sort by Corrected_pValue
Root vs rhizome			DEG_list	2359				Root vs stem			DEG_list	1391				Root vs leaf		DEG_list	4568					Root vs flower			DEG_list	2249				Root vs fruit			DEG_list	2249
GO_accession	Description	Term_type	Over_represented_pValue	Corrected_pValue	DEG_item	Bg_item		GO_accession	Description	Term_type	Over_represented_pValue	Corrected_pValue	DEG_item	Bg_item		GO_accession	Description	Term_type	Over_represented_pValue	Corrected_pValue	DEG_item	Bg_item		GO_accession	Description	Term_type	Over_represented_pValue	Corrected_pValue	DEG_item	Bg_item		GO_accession	Description	Term_type	Over_represented_pValue	Corrected_pValue	DEG_item	Bg_item
GO:0020037	heme binding	molecular_function	1.2514e-42	7.9787e-39	141	1624		GO:0020037	heme binding	molecular_function	1.5947e-47	1.0168e-43	114	1624		GO:0020037	heme binding	molecular_function	2.2211e-69	1.4162e-65	251	1624		GO:0020037	heme binding	molecular_function	1.2894e-36	8.221e-33	128	1624		GO:0020037	heme binding	molecular_function	1.2894e-36	8.221e-33	128	1624
GO:0046906	tetrapyrrole binding	molecular_function	4.3981e-41	1.4021e-37	141	1672		GO:0046906	tetrapyrrole binding	molecular_function	3.584e-46	1.1426e-42	114	1672		GO:0046906	tetrapyrrole binding	molecular_function	8.0893e-68	2.5789e-64	253	1672		GO:0046906	tetrapyrrole binding	molecular_function	3.0403e-35	9.6926e-32	128	1672		GO:0046906	tetrapyrrole binding	molecular_function	3.0403e-35	9.6926e-32	128	1672
GO:0003824	catalytic activity	molecular_function	5.5294e-35	1.1752e-31	1297	43669		GO:0003824	catalytic activity	molecular_function	1.3534e-36	2.8765e-33	824	43669		GO:0005506	iron ion binding	molecular_function	2.9362e-47	6.2403e-44	198	1435		GO:0004601	peroxidase activity	molecular_function	9.7244e-30	1.5501e-26	62	477		GO:0004601	peroxidase activity	molecular_function	9.7244e-30	1.5501e-26	62	477
GO:0004601	peroxidase activity	molecular_function	7.214e-33	9.1993e-30	67	477		GO:0004601	peroxidase activity	molecular_function	3.9288e-33	5.0099e-30	54	477		GO:0016705	oxidoreductase activity, acting on paired donors, with incorporation or reduction of molecular oxygen	molecular_function	5.5442e-47	8.8374e-44	196	1400		GO:0006804	obsolete peroxidase reaction	biological_process	9.7244e-30	1.5501e-26	62	477		GO:0006804	obsolete peroxidase reaction	biological_process	9.7244e-30	1.5501e-26	62	477
GO:0006804	obsolete peroxidase reaction	biological_process	7.214e-33	9.1993e-30	67	477		GO:0006804	obsolete peroxidase reaction	biological_process	3.9288e-33	5.0099e-30	54	477		GO:0003824	catalytic activity	molecular_function	1.2475e-42	1.5908e-39	2391	43669		GO:0016684	oxidoreductase activity, acting on peroxide as acceptor	molecular_function	6.7021e-29	8.5466e-26	64	527		GO:0016684	oxidoreductase activity, acting on peroxide as acceptor	molecular_function	6.7021e-29	8.5466e-26	64	527
GO:0016684	oxidoreductase activity, acting on peroxide as acceptor	molecular_function	7.8182e-32	8.3081e-29	69	527		GO:0016684	oxidoreductase activity, acting on peroxide as acceptor	molecular_function	8.1928e-33	8.7062e-30	56	527		GO:0016491	oxidoreductase activity	molecular_function	7.9511e-37	8.4494e-34	665	9406		GO:0006979	response to oxidative stress	biological_process	6.5131e-26	6.9212e-23	65	618		GO:0006979	response to oxidative stress	biological_process	6.5131e-26	6.9212e-23	65	618
GO:0006979	response to oxidative stress	biological_process	9.1999e-28	8.3798e-25	69	618		GO:0006979	response to oxidative stress	biological_process	1.7762e-28	1.6179e-25	55	618		GO:0055114	oxidation-reduction process	biological_process	1.4525e-34	1.323e-31	670	9658		GO:0016209	antioxidant activity	molecular_function	7.3046e-22	6.6534e-19	68	793		GO:0016209	antioxidant activity	molecular_function	7.3046e-22	6.6534e-19	68	793
GO:0006073	cellular glucan metabolic process	biological_process	6.9247e-25	4.9057e-22	95	1182		GO:0016491	oxidoreductase activity	molecular_function	2.1582e-28	1.7201e-25	255	9406		GO:0016740	transferase activity	molecular_function	1.4329e-28	1.0151e-25	985	15405		GO:0003824	catalytic activity	molecular_function	8.6094e-21	6.8617e-18	1172	43669		GO:0003824	catalytic activity	molecular_function	8.6094e-21	6.8617e-18	1172	43669
GO:0044042	glucan metabolic process	biological_process	6.9247e-25	4.9057e-22	95	1182		GO:0055114	oxidation-reduction process	biological_process	1.2532e-25	8.8785e-23	252	9658		GO:0006468	protein phosphorylation	biological_process	1.3709e-27	8.7411e-25	323	3687		GO:0016491	oxidoreductase activity	molecular_function	8.5533e-17	6.0595e-14	319	9406		GO:0016491	oxidoreductase activity	molecular_function	8.5533e-17	6.0595e-14	319	9406
GO:0044264	cellular polysaccharide metabolic process	biological_process	1.7955e-23	1.1448e-20	97	1278		GO:0016209	antioxidant activity	molecular_function	2.0064e-25	1.2793e-22	58	793		GO:0004672	protein kinase activity	molecular_function	1.761e-27	1.0207e-24	341	3932		GO:0001071	nucleic acid binding transcription factor activity	molecular_function	2.7571e-16	1.5981e-13	144	3006		GO:0001071	nucleic acid binding transcription factor activity	molecular_function	2.7571e-16	1.5981e-13	144	3006
GO:0016209	antioxidant activity	molecular_function	2.544e-23	1.4746e-20	72	793		GO:0016705	oxidoreductase activity, acting on paired donors, with incorporation or reduction of molecular oxygen	molecular_function	2.7982e-20	1.6219e-17	69	1400		GO:0001071	nucleic acid binding transcription factor activity	molecular_function	1.0764e-26	5.2794e-24	277	3006		GO:0003700	transcription factor activity, sequence-specific DNA binding	molecular_function	2.7571e-16	1.5981e-13	144	3006		GO:0003700	transcription factor activity, sequence-specific DNA binding	molecular_function	2.7571e-16	1.5981e-13	144	3006
GO:0005976	polysaccharide metabolic process	biological_process	2.6337e-22	1.3994e-19	98	1349		GO:0005506	iron ion binding	molecular_function	3.1612e-18	1.6796e-15	66	1435		GO:0003700	transcription factor activity, sequence-specific DNA binding	molecular_function	1.0764e-26	5.2794e-24	277	3006		GO:0006073	cellular glucan metabolic process	biological_process	1.5592e-15	7.6475e-13	75	1182		GO:0006073	cellular glucan metabolic process	biological_process	1.5592e-15	7.6475e-13	75	1182
GO:0005618	cell wall	cellular_component	3.627e-21	1.7789e-18	57	561		GO:0008171	O-methyltransferase activity	molecular_function	9.5639e-16	4.6907e-13	28	286		GO:0016301	kinase activity	molecular_function	2.1225e-23	9.6664e-21	402	5163		GO:0044042	glucan metabolic process	biological_process	1.5592e-15	7.6475e-13	75	1182		GO:0044042	glucan metabolic process	biological_process	1.5592e-15	7.6475e-13	75	1182
GO:0004553	hydrolase activity, hydrolyzing O-glycosyl compounds	molecular_function	5.6279e-20	2.449e-17	118	1919		GO:0044264	cellular polysaccharide metabolic process	biological_process	3.1358e-13	1.3329e-10	55	1278		GO:0004601	peroxidase activity	molecular_function	2.5762e-23	1.0266e-20	77	477		GO:0055114	oxidation-reduction process	biological_process	1.8031e-15	8.2119e-13	320	9658		GO:0055114	oxidation-reduction process	biological_process	1.8031e-15	8.2119e-13	320	9658
GO:0030599	pectinesterase activity	molecular_function	5.7614e-20	2.449e-17	35	203		GO:0006073	cellular glucan metabolic process	biological_process	5.285e-13	1.9822e-10	52	1182		GO:0006804	obsolete peroxidase reaction	biological_process	2.5762e-23	1.0266e-20	77	477		GO:0030312	external encapsulating structure	cellular_component	2.4046e-15	1.0221e-12	64	961		GO:0030312	external encapsulating structure	cellular_component	2.4046e-15	1.0221e-12	64	961
Sort by number of DEGs
Root vs rhizome			DEG_list	2359				Root vs stem			DEG_list	1391				Root vs leaf		DEG_list	4568					Root vs flower			DEG_list	2249				Root vs fruit			DEG_list	2249
GO_accession	Description	Term_type	Over_represented_pValue	Corrected_pValue	DEG_item	Bg_item		GO_accession	Description	Term_type	Over_represented_pValue	Corrected_pValue	DEG_item	Bg_item		GO_accession	Description	Term_type	Over_represented_pValue	Corrected_pValue	DEG_item	Bg_item		GO_accession	Description	Term_type	Over_represented_pValue	Corrected_pValue	DEG_item	Bg_item		GO_accession	Description	Term_type	Over_represented_pValue	Corrected_pValue	DEG_item	Bg_item
GO:0008152	metabolic process	biological_process	1.5806e-09	2.3437e-07	1382	54713		GO:0003824	catalytic activity	molecular_function	1.3534e-36	2.8765e-33	824	43669		GO:0008152	metabolic process	biological_process	2.9901e-16	7.3327e-14	2673	54713		GO:0008152	metabolic process	biological_process	0.00071757	0.045753	1263	54713		GO:0008152	metabolic process	biological_process	0.00071757	0.045753	1263	54713
GO:0003824	catalytic activity	molecular_function	5.5294e-35	1.1752e-31	1297	43669		GO:0008152	metabolic process	biological_process	1.4968e-05	0.0020305	812	54713		GO:0009987	cellular process	biological_process	0.98933	1	2411	55914		GO:0003824	catalytic activity	molecular_function	8.6094e-21	6.8617e-18	1172	43669		GO:0003824	catalytic activity	molecular_function	8.6094e-21	6.8617e-18	1172	43669
GO:0009987	cellular process	biological_process	0.99768	1	1217	55914		GO:0005488	binding	molecular_function	0.56156	1	685	50395		GO:0005488	binding	molecular_function	4.3094e-06	0.00028326	2403	50395		GO:0005488	binding	molecular_function	0.12245	1	1139	50395		GO:0005488	binding	molecular_function	0.12245	1	1139	50395
GO:0005488	binding	molecular_function	0.61562	1	1159	50395		GO:0009987	cellular process	biological_process	1	1	656	55914		GO:0003824	catalytic activity	molecular_function	1.2475e-42	1.5908e-39	2391	43669		GO:0009987	cellular process	biological_process	0.99996	1	1132	55914		GO:0009987	cellular process	biological_process	0.99996	1	1132	55914
GO:0071704	organic substance metabolic process	biological_process	0.092284	1	1060	44722		GO:0044699	single-organism process	biological_process	9.3421e-06	0.0012949	630	40544		GO:0071704	organic substance metabolic process	biological_process	0.065354	1	2040	44722		GO:0071704	organic substance metabolic process	biological_process	0.7987	1	961	44722		GO:0071704	organic substance metabolic process	biological_process	0.7987	1	961	44722
GO:0044699	single-organism process	biological_process	1.6646e-05	0.0016584	1034	40544		GO:0071704	organic substance metabolic process	biological_process	0.94706	1	577	44722		GO:0044238	primary metabolic process	biological_process	0.042061	0.87929	1964	42838		GO:0044699	single-organism process	biological_process	0.021944	0.6101	939	40544		GO:0044699	single-organism process	biological_process	0.021944	0.6101	939	40544
GO:0044238	primary metabolic process	biological_process	0.14209	1	1011	42838		GO:0044238	primary metabolic process	biological_process	0.94057	1	553	42838		GO:0044699	single-organism process	biological_process	0.00074522	0.031677	1915	40544		GO:0044238	primary metabolic process	biological_process	0.84731	1	916	42838		GO:0044238	primary metabolic process	biological_process	0.84731	1	916	42838
GO:0044237	cellular metabolic process	biological_process	0.99217	1	900	41437		GO:0044237	cellular metabolic process	biological_process	1	1	484	41437		GO:0044237	cellular metabolic process	biological_process	0.77748	1	1827	41437		GO:0044237	cellular metabolic process	biological_process	0.99744	1	848	41437		GO:0044237	cellular metabolic process	biological_process	0.99744	1	848	41437
GO:0043170	macromolecule metabolic process	biological_process	0.22102	1	780	32936		GO:0044710	single-organism metabolic process	biological_process	1.8474e-12	6.544e-10	430	23589		GO:0043170	macromolecule metabolic process	biological_process	0.0030978	0.10396	1561	32936		GO:0043170	macromolecule metabolic process	biological_process	0.20867	1	745	32936		GO:0043170	macromolecule metabolic process	biological_process	0.20867	1	745	32936
GO:0044260	cellular macromolecule metabolic process	biological_process	0.54666	1	690	29777		GO:1901363	heterocyclic compound binding	molecular_function	0.0029531	0.20691	429	28070		GO:0044260	cellular macromolecule metabolic process	biological_process	0.0030932	0.10396	1423	29777		GO:0044260	cellular macromolecule metabolic process	biological_process	0.08304	1	690	29777		GO:0044260	cellular macromolecule metabolic process	biological_process	0.08304	1	690	29777
GO:0044763	single-organism cellular process	biological_process	0.79043	1	687	30267		GO:0097159	organic cyclic compound binding	molecular_function	0.0029974	0.20773	429	28077		GO:1901363	heterocyclic compound binding	molecular_function	5.8237e-06	0.00037132	1386	28070		GO:1901363	heterocyclic compound binding	molecular_function	0.15658	1	640	28070		GO:1901363	heterocyclic compound binding	molecular_function	0.15658	1	640	28070
GO:1901363	heterocyclic compound binding	molecular_function	0.057508	1	683	28070		GO:0043170	macromolecule metabolic process	biological_process	0.95373	1	421	32936		GO:0097159	organic cyclic compound binding	molecular_function	6.1594e-06	0.00038883	1386	28077		GO:0097159	organic cyclic compound binding	molecular_function	0.15806	1	640	28077		GO:0097159	organic cyclic compound binding	molecular_function	0.15806	1	640	28077
GO:0097159	organic cyclic compound binding	molecular_function	0.058242	1	683	28077		GO:0043167	ion binding	molecular_function	0.00023618	0.024289	385	24022		GO:0043167	ion binding	molecular_function	7.1077e-17	2.0411e-14	1311	24022		GO:0043167	ion binding	molecular_function	6.7292e-08	8.5811e-06	633	24022		GO:0043167	ion binding	molecular_function	6.7292e-08	8.5811e-06	633	24022
GO:0044710	single-organism metabolic process	biological_process	2.5727e-10	4.4335e-08	667	23589		GO:0044763	single-organism cellular process	biological_process	0.98569	1	379	30267		GO:0005623	cell	cellular_component	1	1	1252	31740		GO:0005623	cell	cellular_component	1	1	604	31740		GO:0005623	cell	cellular_component	1	1	604	31740
GO:0043167	ion binding	molecular_function	6.1871e-05	0.0052598	637	24022		GO:0044260	cellular macromolecule metabolic process	biological_process	0.9925	1	368	29777		GO:0044464	cell part	cellular_component	1	1	1252	31740		GO:0044464	cell part	cellular_component	1	1	604	31740		GO:0044464	cell part	cellular_component	1	1	604	31740

## Sheet: Rhizome
Supplementary Table 5 Top 15 GO enrichment terms of up-regulated DEGs in rhizome
Bg_list	104946
Sort by Corrected_pValue
Rhizome vs root			DEG_list	530				Rhizome vs stem			DEG_list	47				Rhizome vs leaf			DEG_list	2759				Rhizome vs flower			DEG_list	2322				Rhizome vs fruit			DEG_list	928
GO_accession	Description	Term_type	Over_represented_pValue	Corrected_pValue	DEG_item	Bg_item		GO_accession	Description	Term_type	Over_represented_pValue	Corrected_pValue	DEG_item	Bg_item		GO_accession	Description	Term_type	Over_represented_pValue	Corrected_pValue	DEG_item	Bg_item		GO_accession	Description	Term_type	Over_represented_pValue	Corrected_pValue	DEG_item	Bg_item		GO_accession	Description	Term_type	Over_represented_pValue	Corrected_pValue	DEG_item	Bg_item
GO:0045735	nutrient reservoir activity	molecular_function	1.6933e-34	1.0797e-30	29	200		GO:0030597	RNA glycosylase activity	molecular_function	5.7656e-07	0.0018381	3	37		GO:0020037	heme binding	molecular_function	1.5722e-38	1.0025e-34	146	1624		GO:0020037	heme binding	molecular_function	3.8935e-26	2.4825e-22	112	1624		GO:0045735	nutrient reservoir activity	molecular_function	1.5333e-31	9.7762e-28	32	200
GO:0030597	RNA glycosylase activity	molecular_function	7.1962e-14	1.5294e-10	9	37		GO:0030598	rRNA N-glycosylase activity	molecular_function	5.7656e-07	0.0018381	3	37		GO:0046906	tetrapyrrole binding	molecular_function	1.6027e-37	5.1094e-34	147	1672		GO:0046906	tetrapyrrole binding	molecular_function	5.0844e-25	1.6209e-21	112	1672		GO:0030597	RNA glycosylase activity	molecular_function	8.484e-17	1.8031e-13	12	37
GO:0030598	rRNA N-glycosylase activity	molecular_function	7.1962e-14	1.5294e-10	9	37		GO:0017148	negative regulation of translation	biological_process	4.7042e-06	0.0074984	3	73		GO:0016705	oxidoreductase activity, acting on paired donors, with incorporation or reduction of molecular oxygen	molecular_function	9.5934e-28	2.0389e-24	117	1400		GO:0045735	nutrient reservoir activity	molecular_function	1.8284e-20	3.8859e-17	33	200		GO:0030598	rRNA N-glycosylase activity	molecular_function	8.484e-17	1.8031e-13	12	37
GO:0017148	negative regulation of translation	biological_process	6.3438e-11	8.0896e-08	9	73		GO:0034249	negative regulation of cellular amide metabolic process	biological_process	4.7042e-06	0.0074984	3	73		GO:0005506	iron ion binding	molecular_function	1.0984e-22	1.7509e-19	108	1435		GO:0016705	oxidoreductase activity, acting on paired donors, with incorporation or reduction of molecular oxygen	molecular_function	4.7756e-18	6.0899e-15	88	1400		GO:0020037	heme binding	molecular_function	1.8536e-15	2.9546e-12	52	1624
GO:0034249	negative regulation of cellular amide metabolic process	biological_process	6.3438e-11	8.0896e-08	9	73		GO:0016799	hydrolase activity, hydrolyzing N-glycosyl compounds	molecular_function	2.209e-05	0.023892	3	116		GO:0045735	nutrient reservoir activity	molecular_function	2.1997e-18	2.3376e-15	33	200		GO:0001071	nucleic acid binding transcription factor activity	molecular_function	1.6074e-15	1.4641e-12	145	3006		GO:0046906	tetrapyrrole binding	molecular_function	6.5389e-15	8.3384e-12	52	1672
GO:0080090	regulation of primary metabolic process	biological_process	6.2611e-10	6.6534e-07	92	8764		GO:0016747	transferase activity, transferring acyl groups other than amino-acyl groups	molecular_function	2.2483e-05	0.023892	6	1260		GO:0006355	regulation of transcription, DNA-templated	biological_process	5.578e-18	4.4456e-15	325	7028		GO:0003700	transcription factor activity, sequence-specific DNA binding	molecular_function	1.6074e-15	1.4641e-12	145	3006		GO:0017148	negative regulation of translation	biological_process	8.9201e-13	8.125e-10	12	73
GO:0060255	regulation of macromolecule metabolic process	biological_process	1.0463e-09	8.8428e-07	92	8846		GO:0032269	negative regulation of cellular protein metabolic process	biological_process	8.163e-05	0.065059	3	185		GO:1903506	regulation of nucleic acid-templated transcription	biological_process	5.578e-18	4.4456e-15	325	7028		GO:0005667	transcription factor complex	cellular_component	4.9372e-14	3.935e-11	160	3550		GO:0034249	negative regulation of cellular amide metabolic process	biological_process	8.9201e-13	8.125e-10	12	73
GO:0051171	regulation of nitrogen compound metabolic process	biological_process	1.1095e-09	8.8428e-07	88	8297		GO:0051248	negative regulation of protein metabolic process	biological_process	8.163e-05	0.065059	3	185		GO:2001141	regulation of RNA biosynthetic process	biological_process	7.2175e-18	5.1132e-15	326	7060		GO:0006355	regulation of transcription, DNA-templated	biological_process	3.4168e-13	2.1785e-10	262	7028		GO:0016705	oxidoreductase activity, acting on paired donors, with incorporation or reduction of molecular oxygen	molecular_function	3.7664e-11	3.0018e-08	41	1400
GO:0031323	regulation of cellular metabolic process	biological_process	3.3118e-09	2.3462e-06	91	8954		GO:0009892	negative regulation of metabolic process	biological_process	9.736e-05	0.068974	4	524		GO:0051252	regulation of RNA metabolic process	biological_process	1.8528e-17	1.1814e-14	337	7414		GO:1903506	regulation of nucleic acid-templated transcription	biological_process	3.4168e-13	2.1785e-10	262	7028		GO:0016799	hydrolase activity, hydrolyzing N-glycosyl compounds	molecular_function	1.3189e-09	9.3434e-07	12	116
GO:2000112	regulation of cellular macromolecule biosynthetic process	biological_process	4.4621e-09	2.7107e-06	83	7881		GO:0016746	transferase activity, transferring acyl groups	molecular_function	0.00014193	0.090496	6	1771		GO:0016491	oxidoreductase activity	molecular_function	3.9409e-17	2.2843e-14	377	9406		GO:0010468	regulation of gene expression	biological_process	5.283e-13	3.0006e-10	288	8010		GO:0055114	oxidation-reduction process	biological_process	1.2395e-08	7.9027e-06	137	9658
GO:0010468	regulation of gene expression	biological_process	4.6765e-09	2.7107e-06	84	8010		GO:0010558	negative regulation of macromolecule biosynthetic process	biological_process	0.0002144	0.098692	3	251		GO:0019219	regulation of nucleobase-containing compound metabolic process	biological_process	8.7825e-17	4.6664e-14	337	7505		GO:0060255	regulation of macromolecule metabolic process	biological_process	6.0815e-13	3.0006e-10	311	8846		GO:0005506	iron ion binding	molecular_function	2.5691e-08	1.4891e-05	36	1435
GO:0010556	regulation of macromolecule biosynthetic process	biological_process	5.628e-09	2.7679e-06	83	7913		GO:0031327	negative regulation of cellular biosynthetic process	biological_process	0.0002144	0.098692	3	251		GO:0010468	regulation of gene expression	biological_process	2.942e-16	1.4429e-13	350	8010		GO:2001141	regulation of RNA biosynthetic process	biological_process	6.118e-13	3.0006e-10	262	7060		GO:0010629	negative regulation of gene expression	biological_process	3.2592e-08	1.7317e-05	16	293
GO:0031326	regulation of cellular biosynthetic process	biological_process	5.7539e-09	2.7679e-06	83	7917		GO:2000113	negative regulation of cellular macromolecule biosynthetic process	biological_process	0.0002144	0.098692	3	251		GO:2000112	regulation of cellular macromolecule biosynthetic process	biological_process	8.184e-16	3.5123e-13	343	7881		GO:0051252	regulation of RNA metabolic process	biological_process	7.2779e-13	3.1617e-10	272	7414		GO:0016491	oxidoreductase activity	molecular_function	3.9271e-08	1.9261e-05	132	9406
GO:0009889	regulation of biosynthetic process	biological_process	6.0777e-09	2.7679e-06	83	7928		GO:0051172	negative regulation of nitrogen compound metabolic process	biological_process	0.0002167	0.098692	3	252		GO:0055114	oxidation-reduction process	biological_process	8.2629e-16	3.5123e-13	379	9658		GO:0080090	regulation of primary metabolic process	biological_process	7.4382e-13	3.1617e-10	308	8764		GO:0032269	negative regulation of cellular protein metabolic process	biological_process	1.0649e-07	4.5267e-05	12	185
GO:0019222	regulation of metabolic process	biological_process	6.8133e-09	2.8961e-06	94	9519		GO:0009890	negative regulation of biosynthetic process	biological_process	0.00024267	0.10315	3	262		GO:0010556	regulation of macromolecule biosynthetic process	biological_process	1.0121e-15	4.0332e-13	344	7913
Sort by number of DEGs
Rhizome vs root			DEG_list	530				Rhizome vs stem			DEG_list	47				Rhizome vs leaf			DEG_list	2759				Rhizome vs flower			DEG_list	2322				Rhizome vs fruit			DEG_list	928
GO_accession	Description	Term_type	Over_represented_pValue	Corrected_pValue	DEG_item	Bg_item		GO_accession	Description	Term_type	Over_represented_pValue	Corrected_pValue	DEG_item	Bg_item		GO_accession	Description	Term_type	Over_represented_pValue	Corrected_pValue	DEG_item	Bg_item		GO_accession	Description	Term_type	Over_represented_pValue	Corrected_pValue	DEG_item	Bg_item		GO_accession	Description	Term_type	Over_represented_pValue	Corrected_pValue	DEG_item	Bg_item
GO:0009987	cellular process	biological_process	0.97048	1	269	55914		GO:0003824	catalytic activity	molecular_function	0.023407	1	27	43669		GO:0008152	metabolic process	biological_process	6.8387e-05	0.0061414	1560	54713		GO:0008152	metabolic process	biological_process	5.3743e-05	0.0050392	1319	54713		GO:0008152	metabolic process	biological_process	0.096761	1	511	54713
GO:0008152	metabolic process	biological_process	0.96273	1	261	54713		GO:0008152	metabolic process	biological_process	0.51565	1	25	54713		GO:0005488	binding	molecular_function	2.2111e-13	5.6393e-11	1554	50395		GO:0005488	binding	molecular_function	7.4814e-10	1.5387e-07	1286	50395		GO:0009987	cellular process	biological_process	0.98206	1	475	55914
GO:0005488	binding	molecular_function	0.84142	1	253	50395		GO:0005488	binding	molecular_function	0.42078	1	24	50395		GO:0009987	cellular process	biological_process	0.98058	1	1455	55914		GO:0009987	cellular process	biological_process	0.71949	1	1251	55914		GO:0005488	binding	molecular_function	0.30743	1	468	50395
GO:0071704	organic substance metabolic process	biological_process	0.93013	1	216	44722		GO:0009987	cellular process	biological_process	0.69638	1	24	55914		GO:0003824	catalytic activity	molecular_function	6.7692e-09	1.0037e-06	1320	43669		GO:0003824	catalytic activity	molecular_function	6.4211e-06	0.00073844	1092	43669		GO:0003824	catalytic activity	molecular_function	0.015793	0.56013	429	43669
GO:0044238	primary metabolic process	biological_process	0.83733	1	212	42838		GO:0044699	single-organism process	biological_process	0.5954	1	18	40544		GO:0071704	organic substance metabolic process	biological_process	0.66149	1	1197	44722		GO:0071704	organic substance metabolic process	biological_process	0.083918	1	1045	44722		GO:0071704	organic substance metabolic process	biological_process	0.92599	1	384	44722
GO:0003824	catalytic activity	molecular_function	0.98859	1	202	43669		GO:0044238	primary metabolic process	biological_process	0.70634	1	18	42838		GO:0044238	primary metabolic process	biological_process	0.61574	1	1150	42838		GO:0044238	primary metabolic process	biological_process	0.095856	1	1001	42838		GO:0044699	single-organism process	biological_process	0.24057	1	380	40544
GO:0044237	cellular metabolic process	biological_process	0.96755	1	196	41437		GO:0071704	organic substance metabolic process	biological_process	0.78607	1	18	44722		GO:0044237	cellular metabolic process	biological_process	0.51699	1	1123	41437		GO:0044237	cellular metabolic process	biological_process	0.34891	1	951	41437		GO:0044238	primary metabolic process	biological_process	0.94514	1	365	42838
GO:0044699	single-organism process	biological_process	0.98477	1	188	40544		GO:1901363	heterocyclic compound binding	molecular_function	0.10828	1	17	28070		GO:0044699	single-organism process	biological_process	0.2556	1	1117	40544		GO:0044699	single-organism process	biological_process	0.15917	1	945	40544		GO:0044237	cellular metabolic process	biological_process	0.86756	1	361	41437
GO:0043170	macromolecule metabolic process	biological_process	0.77377	1	165	32936		GO:0097159	organic cyclic compound binding	molecular_function	0.10847	1	17	28077		GO:1901363	heterocyclic compound binding	molecular_function	2.1627e-08	3.134e-06	886	28070		GO:0043170	macromolecule metabolic process	biological_process	0.019714	0.57133	797	32936		GO:0043170	macromolecule metabolic process	biological_process	0.94209	1	279	32936
GO:1901363	heterocyclic compound binding	molecular_function	0.1787	1	157	28070		GO:0044237	cellular metabolic process	biological_process	0.83315	1	16	41437		GO:0097159	organic cyclic compound binding	molecular_function	2.2399e-08	3.1737e-06	886	28077		GO:1901363	heterocyclic compound binding	molecular_function	5.5886e-09	9.6305e-07	757	28070		GO:1901363	heterocyclic compound binding	molecular_function	0.15959	1	270	28070
GO:0097159	organic cyclic compound binding	molecular_function	0.17945	1	157	28077		GO:0043170	macromolecule metabolic process	biological_process	0.66565	1	14	32936		GO:0043170	macromolecule metabolic process	biological_process	0.74502	1	881	32936		GO:0097159	organic cyclic compound binding	molecular_function	5.7866e-09	9.7093e-07	757	28077		GO:0097159	organic cyclic compound binding	molecular_function	0.16053	1	270	28077
GO:0006807	nitrogen compound metabolic process	biological_process	0.59226	1	155	30073		GO:0044710	single-organism metabolic process	biological_process	0.25459	1	13	23589		GO:0044260	cellular macromolecule metabolic process	biological_process	0.59772	1	809	29777		GO:0044260	cellular macromolecule metabolic process	biological_process	0.019241	0.56018	727	29777		GO:0005623	cell	cellular_component	0.96468	1	265	31740
GO:0044260	cellular macromolecule metabolic process	biological_process	0.72579	1	151	29777		GO:0009058	biosynthetic process	biological_process	0.25887	1	13	23645		GO:0006807	nitrogen compound metabolic process	biological_process	0.90669	1	785	30073		GO:0005623	cell	cellular_component	0.92088	1	693	31740		GO:0044464	cell part	cellular_component	0.96468	1	265	31740
GO:0034641	cellular nitrogen compound metabolic process	biological_process	0.25535	1	148	26904		GO:0043167	ion binding	molecular_function	0.28167	1	13	24022		GO:0005623	cell	cellular_component	0.99999	1	761	31740		GO:0044464	cell part	cellular_component	0.92088	1	693	31740		GO:0006807	nitrogen compound metabolic process	biological_process	0.76859	1	264	30073
GO:0005623	cell	cellular_component	0.9796	1	145	31740		GO:0034641	cellular nitrogen compound metabolic process	biological_process	0.44723	1	13	26904		GO:0044464	cell part	cellular_component	0.99999	1	761	31740		GO:0006807	nitrogen compound metabolic process	biological_process	0.92126	1	653	30073		GO:0044260	cellular macromolecule metabolic process	biological_process	0.8194	1	261	29777
GO:0044464	cell part	cellular_component	0.9796	1	145	31740		GO:0044260	cellular macromolecule metabolic process	biological_process	0.61941	1	13	29777																		GO:0043167	ion binding	molecular_function	1.7226e-05	0.0016641	634	24022

## Sheet: Stem
Supplementary Table 5 Top 15 GO enrichment terms of up-regulated DEGs in aerial stem
Bg_list	104946
Sort by Corrected_pValue
Stem vs root		DEG_list	527					Stem vs rhizome			DEG_list	284				stem vs leaf			DEG_list	699				Stem vs flower			DEG_list	800				Stem vs fruit			DEG_list	174
GO_accession	Description	Term_type	Over_represented_pValue	Corrected_pValue	DEG_item	Bg_item		GO_accession	Description	Term_type	Over_represented_pValue	Corrected_pValue	DEG_item	Bg_item		GO_accession	Description	Term_type	Over_represented_pValue	Corrected_pValue	DEG_item	Bg_item		GO_accession	Description	Term_type	Over_represented_pValue	Corrected_pValue	DEG_item	Bg_item		GO_accession	Description	Term_type	Over_represented_pValue	Corrected_pValue	DEG_item	Bg_item
GO:0009579	thylakoid	cellular_component	4.894e-25	3.1204e-21	45	1089		GO:0009579	thylakoid	cellular_component	2.5543e-39	1.6286e-35	47	1089		GO:0020037	heme binding	molecular_function	3.0115e-21	1.9201e-17	53	1624		GO:0045735	nutrient reservoir activity	molecular_function	1.4559e-18	9.2825e-15	21	200		GO:0009765	photosynthesis, light harvesting	biological_process	4.2031e-06	0.026799	3	23
GO:0015979	photosynthesis	biological_process	1.4022e-24	4.4702e-21	45	1143		GO:0044436	thylakoid part	cellular_component	2.3911e-38	7.623e-35	46	1073		GO:0046906	tetrapyrrole binding	molecular_function	1.2104e-20	3.8587e-17	53	1672		GO:0020037	heme binding	molecular_function	8.3257e-15	2.6542e-11	47	1624		GO:0020037	heme binding	molecular_function	1.6525e-05	0.048268	12	1624
GO:0044436	thylakoid part	cellular_component	1.8844e-23	4.0051e-20	43	1073		GO:0015979	photosynthesis	biological_process	1.5684e-37	3.3335e-34	46	1143		GO:0045735	nutrient reservoir activity	molecular_function	1.888e-18	4.0127e-15	20	200		GO:0046906	tetrapyrrole binding	molecular_function	2.6009e-14	5.5278e-11	47	1672		GO:0046906	tetrapyrrole binding	molecular_function	2.2711e-05	0.048268	12	1672
GO:0009521	photosystem	cellular_component	8.3293e-23	1.3277e-19	38	832		GO:0034357	photosynthetic membrane	cellular_component	1.0586e-36	1.645e-33	43	960		GO:0016705	oxidoreductase activity, acting on paired donors, with incorporation or reduction of molecular oxygen	molecular_function	2.2165e-16	3.533e-13	43	1400		GO:0001071	nucleic acid binding transcription factor activity	molecular_function	8.6341e-13	1.101e-09	66	3006		GO:0015743	malate transport	biological_process	4.346e-05	0.069275	4	99
GO:0034357	photosynthetic membrane	cellular_component	1.2387e-21	1.5796e-18	39	960		GO:0009521	photosystem	cellular_component	1.29e-36	1.645e-33	41	832		GO:0005506	iron ion binding	molecular_function	7.3231e-13	9.3384e-10	38	1435		GO:0003700	transcription factor activity, sequence-specific DNA binding	molecular_function	8.6341e-13	1.101e-09	66	3006		GO:0015740	C4-dicarboxylate transport	biological_process	7.715e-05	0.098382	4	123
GO:0009654	photosystem II oxygen evolving complex	cellular_component	3.4815e-20	3.6996e-17	19	165		GO:0009654	photosystem II oxygen evolving complex	cellular_component	1.5856e-23	1.685e-20	18	165		GO:0006355	regulation of transcription, DNA-templated	biological_process	3.9326e-10	3.5821e-07	97	7028		GO:0005667	transcription factor complex	cellular_component	3.7168e-11	3.9497e-08	70	3550		GO:0046983	protein dimerization activity	molecular_function	0.0001765	0.18756	10	1309
GO:0042651	thylakoid membrane	cellular_component	9.1544e-17	8.3383e-14	21	322		GO:0042651	thylakoid membrane	cellular_component	3.0416e-22	2.7705e-19	21	322		GO:1903506	regulation of nucleic acid-templated transcription	biological_process	3.9326e-10	3.5821e-07	97	7028		GO:0006355	regulation of transcription, DNA-templated	biological_process	8.5222e-10	6.7922e-07	106	7028		GO:0045735	nutrient reservoir activity	molecular_function	0.00026262	0.23921	4	200
GO:0045735	nutrient reservoir activity	molecular_function	1.6476e-15	1.3131e-12	16	200		GO:0009523	photosystem II	cellular_component	9.804e-21	7.8138e-18	25	608		GO:2001141	regulation of RNA biosynthetic process	biological_process	5.2197e-10	4.1601e-07	97	7060		GO:1903506	regulation of nucleic acid-templated transcription	biological_process	8.5222e-10	6.7922e-07	106	7028		GO:0006835	dicarboxylic acid transport	biological_process	0.00033394	0.26615	4	177
GO:0009523	photosystem II	cellular_component	1.7165e-13	1.216e-10	24	608		GO:0009522	photosystem I	cellular_component	1.499e-19	1.0619e-16	17	212		GO:0051252	regulation of RNA metabolic process	biological_process	1.4393e-09	9.2203e-07	99	7414		GO:2001141	regulation of RNA biosynthetic process	biological_process	1.1429e-09	8.0967e-07	106	7060		GO:0019684	photosynthesis, light reaction	biological_process	0.0011119	0.66631	4	262
GO:0009522	photosystem I	cellular_component	1.158e-12	7.3835e-10	15	212		GO:1990204	oxidoreductase complex	cellular_component	4.1792e-16	2.6646e-13	18	438		GO:0016491	oxidoreductase activity	molecular_function	1.4461e-09	9.2203e-07	111	9406		GO:0051252	regulation of RNA metabolic process	biological_process	7.2133e-09	4.5992e-06	107	7414		GO:0004601	peroxidase activity	molecular_function	0.0011593	0.66631	5	477
GO:1990204	oxidoreductase complex	cellular_component	1.4764e-12	8.558e-10	19	438		GO:0009538	photosystem I reaction center	cellular_component	5.6459e-14	3.2725e-11	10	87		GO:0019219	regulation of nucleobase-containing compound metabolic process	biological_process	2.5181e-09	1.4596e-06	99	7505		GO:0019219	regulation of nucleobase-containing compound metabolic process	biological_process	1.2665e-08	7.3412e-06	107	7505		GO:0006804	obsolete peroxidase reaction	biological_process	0.0011593	0.66631	5	477
GO:0019898	extrinsic component of membrane	cellular_component	1.683e-11	8.9425e-09	18	431		GO:0019898	extrinsic component of membrane	cellular_component	1.3211e-13	7.0194e-11	16	431		GO:2000112	regulation of cellular macromolecule biosynthetic process	biological_process	3.2272e-08	1.7147e-05	98	7881		GO:2000112	regulation of cellular macromolecule biosynthetic process	biological_process	1.4563e-08	7.7376e-06	110	7881		GO:0016702	oxidoreductase activity, acting on single donors with incorporation of molecular oxygen, incorporation of two atoms of oxygen	molecular_function	0.001254	0.66631	4	261
GO:0046537	2,3-bisphosphoglycerate-independent phosphoglycerate mutase activity	molecular_function	3.3555e-10	1.6457e-07	7	37		GO:0098796	membrane protein complex	cellular_component	5.9944e-13	2.94e-10	46	4938		GO:0010468	regulation of gene expression	biological_process	3.8376e-08	1.7618e-05	99	8010		GO:0010556	regulation of macromolecule biosynthetic process	biological_process	1.8748e-08	8.1864e-06	110	7913		GO:0046537	2,3-bisphosphoglycerate-independent phosphoglycerate mutase activity	molecular_function	0.0014842	0.72792	2	37
GO:0010109	regulation of photosynthesis	biological_process	4.184e-10	1.9055e-07	8	57		GO:0016052	carbohydrate catabolic process	biological_process	1.1494e-12	5.2348e-10	19	796		GO:0010556	regulation of macromolecule biosynthetic process	biological_process	4.0662e-08	1.7618e-05	98	7913		GO:0010468	regulation of gene expression	biological_process	1.9075e-08	8.1864e-06	111	8010		GO:0016684	oxidoreductase activity, acting on peroxide as acceptor	molecular_function	0.0017957	0.81783	5	527
GO:0019684	photosynthesis, light reaction	biological_process	1.5964e-09	6.7857e-07	13	262		GO:0046537	2,3-bisphosphoglycerate-independent phosphoglycerate mutase activity	molecular_function	5.0109e-12	2.13e-09	7	37		GO:0031326	regulation of cellular biosynthetic process	biological_process	4.1673e-08	1.7618e-05	98	7917		GO:0031326	regulation of cellular biosynthetic process	biological_process	1.9259e-08	8.1864e-06	110	7917		GO:0006007	glucose catabolic process	biological_process	0.0028976	1	2	51
Sort by number of DEGs
Stem vs root		DEG_list	527					Stem vs rhizome			DEG_list	284				stem vs leaf			DEG_list	699				Stem vs flower			DEG_list	800				Stem vs fruit			DEG_list	174
GO_accession	Description	Term_type	Over_represented_pValue	Corrected_pValue	DEG_item	Bg_item		GO_accession	Description	Term_type	Over_represented_pValue	Corrected_pValue	DEG_item	Bg_item		GO_accession	Description	Term_type	Over_represented_pValue	Corrected_pValue	DEG_item	Bg_item		GO_accession	Description	Term_type	Over_represented_pValue	Corrected_pValue	DEG_item	Bg_item		GO_accession	Description	Term_type	Over_represented_pValue	Corrected_pValue	DEG_item	Bg_item
GO:0008152	metabolic process	biological_process	0.00011198	0.012749	322	54713		GO:0008152	metabolic process	biological_process	1.4873e-09	3.9511e-07	199	54713		GO:0008152	metabolic process	biological_process	0.17641	1	382	54713		GO:0008152	metabolic process	biological_process	0.078592	1	443	54713		GO:0005488	binding	molecular_function	0.058401	1	97	50395
GO:0009987	cellular process	biological_process	0.37337	1	293	55914		GO:0009987	cellular process	biological_process	0.2241	1	162	55914		GO:0005488	binding	molecular_function	0.0092568	0.69437	377	50395		GO:0005488	binding	molecular_function	0.0076686	0.53731	430	50395		GO:0009987	cellular process	biological_process	0.94199	1	85	55914
GO:0003824	catalytic activity	molecular_function	0.0030562	0.22143	258	43669		GO:0003824	catalytic activity	molecular_function	0.015502	0.68168	140	43669		GO:0009987	cellular process	biological_process	0.99854	1	342	55914		GO:0009987	cellular process	biological_process	0.8885	1	419	55914		GO:0008152	metabolic process	biological_process	0.90151	1	84	54713
GO:0005488	binding	molecular_function	0.79534	1	254	50395		GO:0044237	cellular metabolic process	biological_process	0.0059892	0.32638	137	41437		GO:0003824	catalytic activity	molecular_function	0.11344	1	314	43669		GO:0003824	catalytic activity	molecular_function	0.2414	1	351	43669		GO:0044699	single-organism process	biological_process	0.41411	1	71	40544
GO:0044699	single-organism process	biological_process	0.0070396	0.44004	239	40544		GO:0005488	binding	molecular_function	0.78147	1	135	50395		GO:0044699	single-organism process	biological_process	0.059567	1	298	40544		GO:0071704	organic substance metabolic process	biological_process	0.66952	1	343	44722		GO:0003824	catalytic activity	molecular_function	0.71702	1	71	43669
GO:0044237	cellular metabolic process	biological_process	0.053607	1	234	41437		GO:0044699	single-organism process	biological_process	0.0070753	0.36676	134	40544		GO:0071704	organic substance metabolic process	biological_process	0.99728	1	269	44722		GO:0044699	single-organism process	biological_process	0.13696	1	333	40544		GO:0071704	organic substance metabolic process	biological_process	0.98065	1	63	44722
GO:0071704	organic substance metabolic process	biological_process	0.7528	1	224	44722		GO:0071704	organic substance metabolic process	biological_process	0.8777	1	115	44722		GO:0044237	cellular metabolic process	biological_process	0.9289	1	265	41437		GO:0044238	primary metabolic process	biological_process	0.6027	1	331	42838		GO:0044237	cellular metabolic process	biological_process	0.94203	1	61	41437
GO:0044238	primary metabolic process	biological_process	0.67563	1	217	42838		GO:0005623	cell	cellular_component	0.0044802	0.25279	110	31740		GO:0044238	primary metabolic process	biological_process	0.99619	1	258	42838		GO:0044237	cellular metabolic process	biological_process	0.66382	1	319	41437		GO:0044238	primary metabolic process	biological_process	0.97124	1	61	42838
GO:0044710	single-organism metabolic process	biological_process	9.7789e-08	2.2268e-05	173	23589		GO:0044464	cell part	cellular_component	0.0044802	0.25279	110	31740		GO:0043170	macromolecule metabolic process	biological_process	0.90956	1	210	32936		GO:0043170	macromolecule metabolic process	biological_process	0.24801	1	268	32936		GO:1901363	heterocyclic compound binding	molecular_function	0.13568	1	55	28070
GO:0005623	cell	cellular_component	0.52915	1	165	31740		GO:0044238	primary metabolic process	biological_process	0.91825	1	108	42838		GO:1901363	heterocyclic compound binding	molecular_function	0.084512	1	209	28070		GO:0005623	cell	cellular_component	0.26445	1	258	31740		GO:0097159	organic cyclic compound binding	molecular_function	0.13605	1	55	28077
GO:0044464	cell part	cellular_component	0.52915	1	165	31740		GO:0044710	single-organism metabolic process	biological_process	1.7355e-07	2.9907e-05	103	23589		GO:0097159	organic cyclic compound binding	molecular_function	0.085044	1	209	28077		GO:0044464	cell part	cellular_component	0.26445	1	258	31740		GO:0005623	cell	cellular_component	0.54176	1	54	31740
GO:0044763	single-organism cellular process	biological_process	0.6327	1	156	30267		GO:0005622	intracellular	cellular_component	0.0063602	0.33794	101	28997		GO:0044260	cellular macromolecule metabolic process	biological_process	0.78909	1	196	29777		GO:0044260	cellular macromolecule metabolic process	biological_process	0.18022	1	247	29777		GO:0044464	cell part	cellular_component	0.54176	1	54	31740
GO:0005622	intracellular	cellular_component	0.41183	1	154	28997		GO:0044424	intracellular part	cellular_component	0.0062584	0.33532	99	28234		GO:0043167	ion binding	molecular_function	0.0080348	0.64848	193	24022		GO:1901363	heterocyclic compound binding	molecular_function	0.12504	1	235	28070		GO:0043170	macromolecule metabolic process	biological_process	0.78245	1	52	32936
GO:0044424	intracellular part	cellular_component	0.3548	1	152	28234		GO:0016020	membrane	cellular_component	0.00095582	0.070864	90	23301		GO:0006807	nitrogen compound metabolic process	biological_process	0.95458	1	186	30073		GO:0097159	organic cyclic compound binding	molecular_function	0.12579	1	235	28077		GO:0044260	cellular macromolecule metabolic process	biological_process	0.66678	1	49	29777
GO:0043170	macromolecule metabolic process	biological_process	0.99728	1	143	32936		GO:0044763	single-organism cellular process	biological_process	0.68587	1	82	30267		GO:0005623	cell	cellular_component	0.99875	1	182	31740		GO:0005622	intracellular	cellular_component	0.54614	1	227	28997		GO:0043167	ion binding	molecular_function	0.13368	1	48	24022
																GO:0044464	cell part	cellular_component	0.99875	1	182	31740

## Sheet: Leaf
Supplementary Table 5 Top 15 GO enrichment terms of up-regulated DEGs in Leaf
Bg_list	104946
Sort by Corrected_pValue
Leaf vs root			DEG_list	2574					Leafeaf vs rhizome			DEG_list	3455						Leafeaf vs stem			DEG_list	669				Leafeaf vs flower			DEG_list	3131				Leafeaf vs fruit			DEG_list	676									Leafeaf vs fruit
GO_accession	Description	Term_type	Over_represented_pValue	Corrected_pValue	DEG_item	DEG_list	Bg_item	Bg_list	GO_accession	Description	Term_type	Over_represented_pValue	Corrected_pValue	DEG_item	DEG_list	Bg_item	Bg_list		GO_accession	Description	Term_type	Over_represented_pValue	Corrected_pValue	DEG_item	Bg_item		GO_accession	Description	Term_type	Over_represented_pValue	Corrected_pValue	DEG_item	Bg_item		GO_accession	Description	Term_type	Over_represented_pValue	Corrected_pValue	DEG_item	Bg_item							GO_accession	Description
GO:0009654	photosystem II oxygen evolving complex	cellular_component	1.0158e-21	6.4765e-18	34	2574	165	104946	GO:0016747	transferase activity, transferring acyl groups other than amino-acyl groups	molecular_function	4.9292e-28	3.1428e-24	129	3455	1260	104946		GO:0016747	transferase activity, transferring acyl groups other than amino-acyl groups	molecular_function	2.2483e-17	1.4335e-13	42	1260		GO:0009654	photosystem II oxygen evolving complex	cellular_component	4.3255e-18	2.7579e-14	33	165		GO:0016747	transferase activity, transferring acyl groups other than amino-acyl groups	molecular_function	7.4778e-10	4.7678e-06	31	1260							GO:0016747	transferase activity, transferring acyl groups other than amino-acyl groups
GO:0016747	transferase activity, transferring acyl groups other than amino-acyl groups	molecular_function	1.9082e-18	6.0834e-15	91	2574	1260	104946	GO:0008610	lipid biosynthetic process	biological_process	2.7904e-24	8.8959e-21	168	3455	2028	104946		GO:0016746	transferase activity, transferring acyl groups	molecular_function	8.8329e-16	2.8159e-12	47	1771		GO:0003777	microtubule motor activity	molecular_function	1.1505e-15	3.6679e-12	36	180		GO:0016746	transferase activity, transferring acyl groups	molecular_function	3.2999e-09	1.052e-05	36	1771							GO:0016746	transferase activity, transferring acyl groups
GO:0042651	thylakoid membrane	cellular_component	4.1739e-17	8.871e-14	41	2574	322	104946	GO:0006633	fatty acid biosynthetic process	biological_process	1.837e-22	3.9042e-19	75	3455	598	104946		GO:0008610	lipid biosynthetic process	biological_process	2.0374e-15	4.3302e-12	51	2028		GO:0015979	photosynthesis	biological_process	2.7397e-14	5.8227e-11	90	1143		GO:0016757	transferase activity, transferring glycosyl groups	molecular_function	7.1462e-07	0.0015188	37	2175							GO:0016757	transferase activity, transferring glycosyl groups
GO:0015979	photosynthesis	biological_process	9.9769e-17	1.5903e-13	85	2574	1143	104946	GO:0016746	transferase activity, transferring acyl groups	molecular_function	5.7818e-22	9.2163e-19	144	3455	1771	104946		GO:0006633	fatty acid biosynthetic process	biological_process	5.5768e-14	8.8894e-11	26	598		GO:0007018	microtubule-based movement	biological_process	1.0731e-13	1.6818e-10	38	251		GO:0005507	copper ion binding	molecular_function	2.0989e-06	0.0033456	15	492							GO:0005507	copper ion binding
GO:0006633	fatty acid biosynthetic process	biological_process	7.0427e-16	8.9809e-13	54	2574	598	104946	GO:0015979	photosynthesis	biological_process	2.1663e-21	2.7625e-18	112	3455	1143	104946		GO:0006631	fatty acid metabolic process	biological_process	1.259e-13	1.6054e-10	28	727		GO:0009521	photosystem	cellular_component	1.3189e-13	1.6818e-10	73	832		GO:0016758	transferase activity, transferring hexosyl groups	molecular_function	2.7393e-06	0.0034932	29	1588							GO:0016758	transferase activity, transferring hexosyl groups
GO:0009579	thylakoid	cellular_component	2.2146e-15	2.3534e-12	81	2574	1089	104946	GO:0006629	lipid metabolic process	biological_process	6.3559e-21	6.7542e-18	240	3455	3531	104946		GO:0006629	lipid metabolic process	biological_process	8.869e-12	9.4248e-09	63	3531		GO:0005874	microtubule	cellular_component	2.3494e-13	2.4967e-10	43	326		GO:0072330	monocarboxylic acid biosynthetic process	biological_process	8.5753e-06	0.0091127	18	788							GO:0072330	monocarboxylic acid biosynthetic process
GO:0009521	photosystem	cellular_component	4.4566e-15	4.0593e-12	68	2574	832	104946	GO:0006631	fatty acid metabolic process	biological_process	9.9033e-21	9.0205e-18	81	3455	727	104946		GO:0072330	monocarboxylic acid biosynthetic process	biological_process	3.2694e-11	2.9779e-08	26	788		GO:0034357	photosynthetic membrane	cellular_component	2.1057e-12	1.7391e-09	77	960		GO:0031225	anchored component of membrane	cellular_component	1.1256e-05	0.010253	6	78							GO:0031225	anchored component of membrane
GO:0006631	fatty acid metabolic process	biological_process	5.5747e-15	4.443e-12	59	2574	727	104946	GO:0009654	photosystem II oxygen evolving complex	cellular_component	2.0969e-20	1.5413e-17	37	3455	165	104946		GO:0032787	monocarboxylic acid metabolic process	biological_process	1.2248e-10	9.7614e-08	48	2542		GO:1990204	oxidoreductase complex	cellular_component	2.2718e-12	1.7391e-09	44	438		GO:0006633	fatty acid biosynthetic process	biological_process	1.4056e-05	0.011203	15	598							GO:0006633	fatty acid biosynthetic process
GO:0044436	thylakoid part	cellular_component	8.8071e-15	6.2393e-12	79	2574	1073	104946	GO:0072330	monocarboxylic acid biosynthetic process	biological_process	2.1757e-20	1.5413e-17	85	3455	788	104946		GO:0044711	single-organism biosynthetic process	biological_process	3.0881e-10	2.1877e-07	92	7127		GO:0042651	thylakoid membrane	cellular_component	2.4549e-12	1.7391e-09	38	322		GO:0016799	hydrolase activity, hydrolyzing N-glycosyl compounds	molecular_function	1.7925e-05	0.011483	7	116							GO:0016799	hydrolase activity, hydrolyzing N-glycosyl compounds
GO:0008610	lipid biosynthetic process	biological_process	1.2594e-14	8.0296e-12	116	2574	2028	104946	GO:0008152	metabolic process	biological_process	5.4017e-20	3.4442e-17	2093	3455	54713	104946		GO:0003824	catalytic activity	molecular_function	5.5162e-10	3.5171e-07	363	43669		GO:0009579	thylakoid	cellular_component	4.8411e-12	3.0867e-09	83	1089		GO:0016705	oxidoreductase activity, acting on paired donors, with incorporation or reduction of molecular oxygen	molecular_function	1.9036e-05	0.011483	24	1400							GO:0016705	oxidoreductase activity, acting on paired donors, with incorporation or reduction of molecular oxygen
GO:0034357	photosynthetic membrane	cellular_component	1.4278e-14	8.276e-12	73	2574	960	104946	GO:0003824	catalytic activity	molecular_function	2.6937e-18	1.5614e-15	1733	3455	43669	104946		GO:0004144	diacylglycerol O-acyltransferase activity	molecular_function	7.4231e-10	3.9442e-07	8	47		GO:0044436	thylakoid part	cellular_component	5.9246e-12	3.265e-09	82	1073		GO:0008194	UDP-glycosyltransferase activity	molecular_function	2.0381e-05	0.011483	17	746							GO:0008194	UDP-glycosyltransferase activity
GO:0016746	transferase activity, transferring acyl groups	molecular_function	2.4268e-13	1.2894e-10	99	2574	1771	104946	GO:0016053	organic acid biosynthetic process	biological_process	1.8578e-17	9.1119e-15	149	3455	2079	104946		GO:0016411	acylglycerol O-acyltransferase activity	molecular_function	7.4231e-10	3.9442e-07	8	47		GO:0005488	binding	molecular_function	6.1449e-12	3.265e-09	1755	50395		GO:0005976	polysaccharide metabolic process	biological_process	2.5027e-05	0.011483	24	1349							GO:0005976	polysaccharide metabolic process
GO:0072330	monocarboxylic acid biosynthetic process	biological_process	4.1266e-13	2.024e-10	59	2574	788	104946	GO:0046394	carboxylic acid biosynthetic process	biological_process	1.8578e-17	9.1119e-15	149	3455	2079	104946		GO:0016053	organic acid biosynthetic process	biological_process	1.9839e-09	9.0351e-07	40	2079		GO:0008017	microtubule binding	molecular_function	1.2454e-11	6.1083e-09	46	405		GO:0006073	cellular glucan metabolic process	biological_process	2.5213e-05	0.011483	22	1182							GO:0006073	cellular glucan metabolic process
GO:0016705	oxidoreductase activity, acting on paired donors, with incorporation or reduction of molecular oxygen	molecular_function	5.4605e-12	2.4869e-09	79	2574	1400	104946	GO:0042651	thylakoid membrane	cellular_component	7.5721e-17	3.4485e-14	47	3455	322	104946		GO:0046394	carboxylic acid biosynthetic process	biological_process	1.9839e-09	9.0351e-07	40	2079		GO:1901363	heterocyclic compound binding	molecular_function	4.0925e-11	1.8153e-08	1036	28070		GO:0044042	glucan metabolic process	biological_process	2.5213e-05	0.011483	22	1182							GO:0044042	glucan metabolic process
GO:0019898	extrinsic component of membrane	cellular_component	2.5972e-11	1.104e-08	38	2574	431	104946	GO:0009521	photosystem	cellular_component	1.2904e-16	5.4852e-14	84	3455	832	104946		GO:0044255	cellular lipid metabolic process	biological_process	4.7937e-09	2.0376e-06	45	2465		GO:0097159	organic cyclic compound binding	molecular_function	4.2705e-11	1.8153e-08	1036	28077		GO:0030597	RNA glycosylase activity	molecular_function	6.0337e-05	0.024044	4	37							GO:0030597	RNA glycosylase activity
Sort by number of DEGs
Leaf vs root			DEG_list	2574					Leafeaf vs rhizome			DEG_list	3455						Leafeaf vs stem			DEG_list	669				Leafeaf vs flower			DEG_list	3131				Leafeaf vs fruit			DEG_list	676									Leafeaf vs fruit
GO_accession	Description	Term_type	Over_represented_pValue	Corrected_pValue	DEG_item	DEG_list	Bg_item	Bg_list	GO_accession	Description	Term_type	Over_represented_pValue	Corrected_pValue	DEG_item	DEG_list	Bg_item	Bg_list		GO_accession	Description	Term_type	Over_represented_pValue	Corrected_pValue	DEG_item	Bg_item		GO_accession	Description	Term_type	Over_represented_pValue	Corrected_pValue	DEG_item	Bg_item		GO_accession	Description	Term_type	Over_represented_pValue	Corrected_pValue	DEG_item	Bg_item
GO:0008152	metabolic process	biological_process	2.3113e-08	6.4074e-06	1503	2574	54713	104946	GO:0008152	metabolic process	biological_process	5.4017e-20	3.4442e-17	2093	3455	54713	104946		GO:0008152	metabolic process	biological_process	1.4226e-06	0.00043192	413	54713		GO:0008152	metabolic process	biological_process	2.2971e-10	7.3233e-08	1831	54713		GO:0005488	binding	molecular_function	0.0038328	0.37027	371	50395
GO:0009987	cellular process	biological_process	0.5782	1	1419	2574	55914	104946	GO:0009987	cellular process	biological_process	0.26107	1	1917	3455	55914	104946		GO:0009987	cellular process	biological_process	0.26985	1	374	55914		GO:0009987	cellular process	biological_process	0.043495	0.60288	1772	55914		GO:0008152	metabolic process	biological_process	0.36423	1	363	54713							GO_accession	Description
GO:0005488	binding	molecular_function	0.0048333	0.19882	1367	2574	50395	104946	GO:0003824	catalytic activity	molecular_function	2.6937e-18	1.5614e-15	1733	3455	43669	104946		GO:0003824	catalytic activity	molecular_function	5.5162e-10	3.5171e-07	363	43669		GO:0005488	binding	molecular_function	6.1449e-12	3.265e-09	1755	50395		GO:0009987	cellular process	biological_process	0.91818	1	352	55914							GO:0005488	binding
GO:0003824	catalytic activity	molecular_function	1.1472e-06	0.00020318	1234	2574	43669	104946	GO:0005488	binding	molecular_function	0.9576	1	1681	3455	50395	104946		GO:0005488	binding	molecular_function	0.82276	1	321	50395		GO:0071704	organic substance metabolic process	biological_process	7.5776e-05	0.0060394	1486	44722		GO:0003824	catalytic activity	molecular_function	0.00030025	0.061754	334	43669							GO:0008152	metabolic process
GO:0071704	organic substance metabolic process	biological_process	0.21355	1	1161	2574	44722	104946	GO:0071704	organic substance metabolic process	biological_process	6.2864e-05	0.0049484	1631	3455	44722	104946		GO:0071704	organic substance metabolic process	biological_process	0.031736	0.80752	317	44722		GO:0003824	catalytic activity	molecular_function	1.2247e-05	0.0013463	1469	43669		GO:0071704	organic substance metabolic process	biological_process	0.5402	1	295	44722							GO:0009987	cellular process
GO:0044238	primary metabolic process	biological_process	0.1205	1	1123	2574	42838	104946	GO:0044238	primary metabolic process	biological_process	8.8131e-05	0.0063855	1565	3455	42838	104946		GO:0044238	primary metabolic process	biological_process	0.030227	0.80303	305	42838		GO:0044238	primary metabolic process	biological_process	7.8307e-05	0.006164	1428	42838		GO:0044699	single-organism process	biological_process	0.19308	1	281	40544							GO:0003824	catalytic activity
GO:0044237	cellular metabolic process	biological_process	0.075521	1	1099	2574	41437	104946	GO:0044237	cellular metabolic process	biological_process	0.00092545	0.048366	1505	3455	41437	104946		GO:0044699	single-organism process	biological_process	0.0030421	0.16866	302	40544		GO:0044237	cellular metabolic process	biological_process	0.00038422	0.021873	1379	41437		GO:0044238	primary metabolic process	biological_process	0.62278	1	280	42838							GO:0071704	organic substance metabolic process
GO:0044699	single-organism process	biological_process	0.10438	1	1073	2574	40544	104946	GO:0044699	single-organism process	biological_process	0.0068026	0.22054	1457	3455	40544	104946		GO:0044237	cellular metabolic process	biological_process	0.057121	1	293	41437		GO:0044699	single-organism process	biological_process	0.74881	1	1243	40544		GO:0044237	cellular metabolic process	biological_process	0.84335	1	263	41437							GO:0044699	single-organism process
GO:0043170	macromolecule metabolic process	biological_process	0.47007	1	853	2574	32936	104946	GO:0043170	macromolecule metabolic process	biological_process	0.33772	1	1143	3455	32936	104946		GO:0044763	single-organism cellular process	biological_process	0.082725	1	218	30267		GO:0043170	macromolecule metabolic process	biological_process	1.293e-05	0.0013973	1139	32936		GO:0043170	macromolecule metabolic process	biological_process	0.47152	1	221	32936							GO:0044238	primary metabolic process
GO:0005623	cell	cellular_component	0.45767	1	818	2574	31740	104946	GO:0005623	cell	cellular_component	0.65988	1	1076	3455	31740	104946		GO:0043170	macromolecule metabolic process	biological_process	0.52718	1	217	32936		GO:0005623	cell	cellular_component	8.2893e-05	0.0063437	1085	31740		GO:0044260	cellular macromolecule metabolic process	biological_process	0.43312	1	202	29777							GO:0044237	cellular metabolic process
GO:0044464	cell part	cellular_component	0.45767	1	818	2574	31740	104946	GO:0044464	cell part	cellular_component	0.65988	1	1076	3455	31740	104946		GO:0044710	single-organism metabolic process	biological_process	2.9972e-08	1.1944e-05	214	23589		GO:0044464	cell part	cellular_component	8.2893e-05	0.0063437	1085	31740		GO:1901363	heterocyclic compound binding	molecular_function	0.23335	1	196	28070							GO:0043170	macromolecule metabolic process
GO:1901363	heterocyclic compound binding	molecular_function	0.00015748	0.015601	809	2574	28070	104946	GO:0044763	single-organism cellular process	biological_process	0.48612	1	1049	3455	30267	104946		GO:0005623	cell	cellular_component	0.49099	1	210	31740		GO:1901363	heterocyclic compound binding	molecular_function	4.0925e-11	1.8153e-08	1036	28070		GO:0097159	organic cyclic compound binding	molecular_function	0.23435	1	196	28077							GO:0044260	cellular macromolecule metabolic process
GO:0097159	organic cyclic compound binding	molecular_function	0.00016109	0.015601	809	2574	28077	104946	GO:0006807	nitrogen compound metabolic process	biological_process	0.43795	1	1033	3455	30073	104946		GO:0044464	cell part	cellular_component	0.49099	1	210	31740		GO:0097159	organic cyclic compound binding	molecular_function	4.2705e-11	1.8153e-08	1036	28077		GO:0044763	single-organism cellular process	biological_process	0.81557	1	193	30267							GO:1901363	heterocyclic compound binding
GO:0006807	nitrogen compound metabolic process	biological_process	0.50402	1	773	2574	30073	104946	GO:0044260	cellular macromolecule metabolic process	biological_process	0.77193	1	1009	3455	29777	104946		GO:0006807	nitrogen compound metabolic process	biological_process	0.40645	1	201	30073		GO:0044260	cellular macromolecule metabolic process	biological_process	4.257e-05	0.0039337	1036	29777		GO:0005623	cell	cellular_component	0.94407	1	193	31740							GO:0097159	organic cyclic compound binding
GO:0044260	cellular macromolecule metabolic process	biological_process	0.54115	1	772	2574	29777	104946	GO:0044710	single-organism metabolic process	biological_process	9.8075e-14	3.1266e-11	981	3455	23589	104946		GO:0009058	biosynthetic process	biological_process	0.00010773	0.015886	197	23645		GO:0005622	intracellular	cellular_component	0.00023297	0.014283	992	28997		GO:0044464	cell part	cellular_component	0.94407	1	193	31740							GO:0044763	single-organism cellular process
																																																GO:0005623	cell
																																																GO:0044464	cell part
[truncated: 7 more columns]

## Sheet: Flower
Supplementary Table 5 Top 15 GO enrichment terms of up-regulated DEGs in flower
Bg_list	104946
Sort by Corrected_pValue
Flower vs root			DEG_list	1774				Flower vs rhizome		DEG_list	4470					Flower vs stem		DEG_list	2093					Flower vs leaf		DEG_list	4411					Flower vs fruit			DEG_list	1456
GO_accession	Description	Term_type	Over_represented_pValue	Corrected_pValue	DEG_item	Bg_item		GO_accession	Description	Term_type	Over_represented_pValue	Corrected_pValue	DEG_item	Bg_item		GO_accession	Description	Term_type	Over_represented_pValue	Corrected_pValue	DEG_item	Bg_item		GO_accession	Description	Term_type	Over_represented_pValue	Corrected_pValue	DEG_item	Bg_item		GO_accession	Description	Term_type	Over_represented_pValue	Corrected_pValue	DEG_item	Bg_item
GO:0009654	photosystem II oxygen evolving complex	cellular_component	4.1806e-23	2.6656e-19	31	165		GO:0003824	catalytic activity	molecular_function	2.9526e-34	1.8826e-30	2303	43669		GO:0030599	pectinesterase activity	molecular_function	2.1611e-33	8.2124e-30	46	203		GO:0016705	oxidoreductase activity, acting on paired donors, with incorporation or reduction of molecular oxygen	molecular_function	1.4965e-31	9.5416e-28	163	1400		GO:0030599	pectinesterase activity	molecular_function	6.6893e-34	2.4936e-30	41	203
GO:0016705	oxidoreductase activity, acting on paired donors, with incorporation or reduction of molecular oxygen	molecular_function	1.095e-22	3.4909e-19	83	1400		GO:0005975	carbohydrate metabolic process	biological_process	1.2156e-27	3.8754e-24	414	5460		GO:0042545	cell wall modification	biological_process	2.576e-33	8.2124e-30	46	204		GO:0005506	iron ion binding	molecular_function	7.2764e-26	2.3197e-22	152	1435		GO:0042545	cell wall modification	biological_process	7.8217e-34	2.4936e-30	41	204
GO:0016491	oxidoreductase activity	molecular_function	1.3042e-20	2.7718e-17	278	9406		GO:0030599	pectinesterase activity	molecular_function	6.6956e-26	1.2861e-22	53	203		GO:0071555	cell wall organization	biological_process	9.0444e-32	1.9222e-28	56	383		GO:0030599	pectinesterase activity	molecular_function	2.1134e-24	4.0217e-21	51	203		GO:0071555	cell wall organization	biological_process	3.2029e-30	6.8072e-27	47	383
GO:0042651	thylakoid membrane	cellular_component	4.6618e-20	7.4308e-17	38	322		GO:0042545	cell wall modification	biological_process	8.0684e-26	1.2861e-22	53	204		GO:0045229	external encapsulating structure organization	biological_process	1.0466e-30	1.6683e-27	56	398		GO:0042545	cell wall modification	biological_process	2.523e-24	4.0217e-21	51	204		GO:0045229	external encapsulating structure organization	biological_process	2.5669e-29	4.0916e-26	47	398
GO:0009579	thylakoid	cellular_component	9.4719e-20	1.2079e-16	72	1089		GO:0016798	hydrolase activity, acting on glycosyl bonds	molecular_function	2.4679e-25	3.1471e-22	208	2088		GO:0016798	hydrolase activity, acting on glycosyl bonds	molecular_function	7.2768e-26	9.2794e-23	128	2088		GO:0020037	heme binding	molecular_function	6.9124e-24	8.8147e-21	160	1624		GO:0016798	hydrolase activity, acting on glycosyl bonds	molecular_function	2.0302e-27	2.5889e-24	106	2088
GO:0015979	photosynthesis	biological_process	3.8176e-19	4.0569e-16	72	1143		GO:0006629	lipid metabolic process	biological_process	2.3327e-24	2.4789e-21	299	3531		GO:0004553	hydrolase activity, hydrolyzing O-glycosyl compounds	molecular_function	1.4389e-25	1.5291e-22	121	1919		GO:0046906	tetrapyrrole binding	molecular_function	7.1054e-23	7.5507e-20	161	1672		GO:0004553	hydrolase activity, hydrolyzing O-glycosyl compounds	molecular_function	8.5491e-27	9.0848e-24	100	1919
GO:0044436	thylakoid part	cellular_component	6.3746e-19	5.8063e-16	70	1073		GO:0016747	transferase activity, transferring acyl groups other than amino-acyl groups	molecular_function	2.5359e-23	2.3098e-20	140	1260		GO:0005975	carbohydrate metabolic process	biological_process	3.4569e-23	2.46e-20	225	5460		GO:0005975	carbohydrate metabolic process	biological_process	1.3976e-20	1.273e-17	382	5460		GO:0006073	cellular glucan metabolic process	biological_process	4.2876e-26	3.4172e-23	75	1182
GO:0009664	plant-type cell wall organization	biological_process	7.5566e-19	6.0226e-16	23	136		GO:0006631	fatty acid metabolic process	biological_process	7.1488e-23	5.6976e-20	98	727		GO:0006073	cellular glucan metabolic process	biological_process	3.4724e-23	2.46e-20	86	1182		GO:0003824	catalytic activity	molecular_function	2.8433e-20	2.2661e-17	2176	43669		GO:0044042	glucan metabolic process	biological_process	4.2876e-26	3.4172e-23	75	1182
GO:0071669	plant-type cell wall organization or biogenesis	biological_process	1.4998e-18	9.6717e-16	23	141		GO:0004553	hydrolase activity, hydrolyzing O-glycosyl compounds	molecular_function	1.1576e-22	8.2011e-20	189	1919		GO:0044042	glucan metabolic process	biological_process	3.4724e-23	2.46e-20	86	1182		GO:0006073	cellular glucan metabolic process	biological_process	2.0985e-19	1.338e-16	125	1182		GO:0005975	carbohydrate metabolic process	biological_process	2.4775e-25	1.7552e-22	180	5460
GO:0034357	photosynthetic membrane	cellular_component	1.5169e-18	9.6717e-16	65	960		GO:0016705	oxidoreductase activity, acting on paired donors, with incorporation or reduction of molecular oxygen	molecular_function	2.7146e-22	1.7308e-19	144	1400		GO:0005618	cell wall	cellular_component	7.5979e-23	4.8444e-20	56	561		GO:0044042	glucan metabolic process	biological_process	2.0985e-19	1.338e-16	125	1182		GO:0005618	cell wall	cellular_component	2.8783e-24	1.8352e-21	49	561
GO:0055114	oxidation-reduction process	biological_process	1.7551e-18	1.0173e-15	276	9658		GO:0006633	fatty acid biosynthetic process	biological_process	3.2653e-22	1.8927e-19	86	598		GO:0005985	sucrose metabolic process	biological_process	9.2014e-23	5.2918e-20	79	1029		GO:0071555	cell wall organization	biological_process	2.5345e-19	1.4691e-16	60	383		GO:0005985	sucrose metabolic process	biological_process	5.2313e-24	2.8429e-21	67	1029
GO:0009521	photosystem	cellular_component	1.9212e-18	1.0208e-15	60	832		GO:0071555	cell wall organization	biological_process	1.0216e-21	5.4283e-19	64	383		GO:0005982	starch metabolic process	biological_process	9.9594e-23	5.2918e-20	79	1031		GO:0005985	sucrose metabolic process	biological_process	3.074e-19	1.6333e-16	114	1029		GO:0005982	starch metabolic process	biological_process	5.6149e-24	2.8429e-21	67	1031
GO:0005506	iron ion binding	molecular_function	4.9391e-18	2.4224e-15	75	1435		GO:0055114	oxidation-reduction process	biological_process	2.0534e-21	1.0071e-18	598	9658		GO:0071554	cell wall organization or biogenesis	biological_process	1.6556e-22	8.12e-20	62	694		GO:0005982	starch metabolic process	biological_process	3.3769e-19	1.6562e-16	114	1031		GO:0044264	cellular polysaccharide metabolic process	biological_process	5.7965e-24	2.8429e-21	75	1278
GO:0005199	structural constituent of cell wall	molecular_function	1.2242e-17	5.5754e-15	20	118		GO:0044710	single-organism metabolic process	biological_process	2.7569e-21	1.2556e-18	1293	23589		GO:0044264	cellular polysaccharide metabolic process	biological_process	5.1386e-22	2.3403e-19	88	1278		GO:0016798	hydrolase activity, acting on glycosyl bonds	molecular_function	5.6088e-19	2.5544e-16	188	2088		GO:0005976	polysaccharide metabolic process	biological_process	8.3753e-24	3.8143e-21	77	1349
GO:0020037	heme binding	molecular_function	2.7409e-15	1.1651e-12	75	1624		GO:0006073	cellular glucan metabolic process	biological_process	4.5003e-21	1.7934e-18	130	1182		GO:0005976	polysaccharide metabolic process	biological_process	1.5287e-21	6.4981e-19	90	1349		GO:0005984	disaccharide metabolic process	biological_process	9.5309e-19	4.0513e-16	121	1149		GO:0005984	disaccharide metabolic process	biological_process	3.2842e-22	1.396e-19	68	1149
								GO:0044042	glucan metabolic process	biological_process	4.5003e-21	1.7934e-18	130	1182
Sort by number of DEGs
Flower vs root			DEG_list	1774				Flower vs rhizome		DEG_list	4470					Flower vs stem		DEG_list	2093					Flower vs leaf		DEG_list	4411					Flower vs fruit			DEG_list	1456
GO_accession	Description	Term_type	Over_represented_pValue	Corrected_pValue	DEG_item	Bg_item		GO_accession	Description	Term_type	Over_represented_pValue	Corrected_pValue	DEG_item	Bg_item		GO_accession	Description	Term_type	Over_represented_pValue	Corrected_pValue	DEG_item	Bg_item		GO_accession	Description	Term_type	Over_represented_pValue	Corrected_pValue	DEG_item	Bg_item		GO_accession	Description	Term_type	Over_represented_pValue	Corrected_pValue	DEG_item	Bg_item
GO:0008152	metabolic process	biological_process	6.8417e-06	0.00069242	1032	54713		GO:0008152	metabolic process	biological_process	3.408e-14	5.7182e-12	2603	54713		GO:0008152	metabolic process	biological_process	0.0017511	0.093984	1172	54713		GO:0008152	metabolic process	biological_process	1.4012e-06	0.00015674	2484	54713		GO:0009987	cellular process	biological_process	0.38056	1	799	55914
GO:0009987	cellular process	biological_process	0.88206	1	949	55914		GO:0009987	cellular process	biological_process	0.42444	1	2447	55914		GO:0009987	cellular process	biological_process	0.86613	1	1115	55914		GO:0009987	cellular process	biological_process	0.72487	1	2389	55914		GO:0008152	metabolic process	biological_process	0.073839	1	797	54713
GO:0003824	catalytic activity	molecular_function	1.3743e-10	3.505e-08	890	43669		GO:0003824	catalytic activity	molecular_function	2.9526e-34	1.8826e-30	2303	43669		GO:0003824	catalytic activity	molecular_function	8.3512e-15	2.3151e-12	1061	43669		GO:0003824	catalytic activity	molecular_function	2.8433e-20	2.2661e-17	2176	43669		GO:0003824	catalytic activity	molecular_function	1.5809e-09	3.3599e-07	728	43669
GO:0005488	binding	molecular_function	0.48009	1	888	50395		GO:0005488	binding	molecular_function	0.99999	1	2075	50395		GO:0005488	binding	molecular_function	0.99923	1	963	50395		GO:0005488	binding	molecular_function	0.98399	1	2119	50395		GO:0005488	binding	molecular_function	0.95921	1	687	50395
GO:0044699	single-organism process	biological_process	0.0097103	0.30499	759	40544		GO:0044699	single-organism process	biological_process	3.6911e-18	9.0517e-16	2052	40544		GO:0071704	organic substance metabolic process	biological_process	0.035858	0.89659	953	44722		GO:0071704	organic substance metabolic process	biological_process	0.036319	0.84808	1986	44722		GO:0071704	organic substance metabolic process	biological_process	0.035308	1	669	44722
GO:0071704	organic substance metabolic process	biological_process	0.96633	1	742	44722		GO:0071704	organic substance metabolic process	biological_process	0.019668	0.40982	2021	44722		GO:0044699	single-organism process	biological_process	2.0077e-08	2.9093e-06	947	40544		GO:0044699	single-organism process	biological_process	7.2163e-09	1.2435e-06	1927	40544		GO:0044238	primary metabolic process	biological_process	0.017681	0.63636	648	42838
GO:0044237	cellular metabolic process	biological_process	0.67217	1	717	41437		GO:0044238	primary metabolic process	biological_process	0.010886	0.26696	1947	42838		GO:0044238	primary metabolic process	biological_process	0.012124	0.45785	925	42838		GO:0044238	primary metabolic process	biological_process	0.024744	0.66013	1911	42838		GO:0044699	single-organism process	biological_process	0.00094354	0.067418	636	40544
GO:0044238	primary metabolic process	biological_process	0.94813	1	714	42838		GO:0044237	cellular metabolic process	biological_process	0.61644	1	1809	41437		GO:0044237	cellular metabolic process	biological_process	0.94758	1	813	41437		GO:0044237	cellular metabolic process	biological_process	0.83678	1	1763	41437		GO:0044237	cellular metabolic process	biological_process	0.8169	1	574	41437
GO:0005623	cell	cellular_component	0.55232	1	555	31740		GO:0044763	single-organism cellular process	biological_process	2.1482e-08	2.1741e-06	1497	30267		GO:0044763	single-organism cellular process	biological_process	0.00071704	0.04396	692	30267		GO:0043170	macromolecule metabolic process	biological_process	0.74808	1	1411	32936		GO:0043170	macromolecule metabolic process	biological_process	0.19895	1	486	32936
GO:0044464	cell part	cellular_component	0.55232	1	555	31740		GO:0043170	macromolecule metabolic process	biological_process	0.98884	1	1381	32936		GO:0043170	macromolecule metabolic process	biological_process	0.3318	1	686	32936		GO:0044763	single-organism cellular process	biological_process	0.0083334	0.31072	1395	30267		GO:0044763	single-organism cellular process	biological_process	0.0022271	0.13654	485	30267
GO:0044710	single-organism metabolic process	biological_process	1.0826e-10	2.8761e-08	523	23589		GO:0044710	single-organism metabolic process	biological_process	2.7569e-21	1.2556e-18	1293	23589		GO:0044260	cellular macromolecule metabolic process	biological_process	0.86375	1	592	29777		GO:0044260	cellular macromolecule metabolic process	biological_process	0.90689	1	1261	29777		GO:0044260	cellular macromolecule metabolic process	biological_process	0.40133	1	432	29777
GO:1901363	heterocyclic compound binding	molecular_function	0.078966	1	521	28070		GO:0005623	cell	cellular_component	0.99999	1	1271	31740		GO:0005623	cell	cellular_component	0.99848	1	591	31740		GO:1901363	heterocyclic compound binding	molecular_function	0.75242	1	1199	28070		GO:0043167	ion binding	molecular_function	0.0021407	0.13382	391	24022
GO:0097159	organic cyclic compound binding	molecular_function	0.07973	1	521	28077		GO:0044464	cell part	cellular_component	0.99999	1	1271	31740		GO:0044464	cell part	cellular_component	0.99848	1	591	31740		GO:0097159	organic cyclic compound binding	molecular_function	0.7551	1	1199	28077		GO:0005623	cell	cellular_component	0.99987	1	391	31740
GO:0043170	macromolecule metabolic process	biological_process	0.99982	1	511	32936		GO:0016020	membrane	cellular_component	1.68e-10	1.9476e-08	1218	23301		GO:0016020	membrane	cellular_component	6.9849e-07	8.5646e-05	580	23301		GO:0005623	cell	cellular_component	1	1	1191	31740		GO:0044464	cell part	cellular_component	0.99987	1	391	31740
GO:0044763	single-organism cellular process	biological_process	0.94202	1	507	30267		GO:0044260	cellular macromolecule metabolic process	biological_process	0.9998	1	1213	29777		GO:0044710	single-organism metabolic process	biological_process	8.438e-06	0.0008277	565	23589		GO:0044464	cell part	cellular_component	1	1	1191	31740		GO:0016020	membrane	cellular_component	0.0039584	0.22335	383	23301

## Sheet: Fruit
Supplementary Table 5 Top 15 GO enrichment terms of up-regulated DEGs in fruit
Bg_list	104946
Sort by Corrected_pValue
Fruit vs root			DEG_list	1774				Fruit vs rhizome			DEG_list	2235				Fruit vs stem			DEG_list	492				Fruit vs leaf			DEG_list	1704				Fruit vs flower			DEG_list	742
GO_accession	Description	Term_type	Over_represented_pValue	Corrected_pValue	DEG_item	Bg_item		GO_accession	Description	Term_type	Over_represented_pValue	Corrected_pValue	DEG_item	Bg_item		GO_accession	Description	Term_type	Over_represented_pValue	Corrected_pValue	DEG_item	Bg_item		GO_accession	Description	Term_type	Over_represented_pValue	Corrected_pValue	DEG_item	Bg_item		GO_accession	Description	Term_type	Over_represented_pValue	Corrected_pValue	DEG_item	Bg_item
GO:0009654	photosystem II oxygen evolving complex	cellular_component	4.1806e-23	2.6656e-19	31	165		GO:0016491	oxidoreductase activity	molecular_function	3.2393e-33	2.0654e-29	376	9406		GO:0005199	structural constituent of cell wall	molecular_function	9.1668e-23	5.8447e-19	17	118		GO:0020037	heme binding	molecular_function	1.5972e-66	1.0184e-62	150	1624		GO:0015979	photosynthesis	biological_process	1.4571e-23	9.2906e-20	51	1143
GO:0016705	oxidoreductase activity, acting on paired donors, with incorporation or reduction of molecular oxygen	molecular_function	1.095e-22	3.4909e-19	83	1400		GO:0055114	oxidation-reduction process	biological_process	4.8738e-29	1.5538e-25	370	9658		GO:0009664	plant-type cell wall organization	biological_process	6.6124e-21	2.108e-17	17	136		GO:0046906	tetrapyrrole binding	molecular_function	1.6466e-65	5.2494e-62	151	1672		GO:0009521	photosystem	cellular_component	5.0096e-23	1.5971e-19	44	832
GO:0016491	oxidoreductase activity	molecular_function	1.3042e-20	2.7718e-17	278	9406		GO:0016705	oxidoreductase activity, acting on paired donors, with incorporation or reduction of molecular oxygen	molecular_function	1.5758e-25	3.3491e-22	100	1400		GO:0071669	plant-type cell wall organization or biogenesis	biological_process	1.1428e-20	2.4287e-17	17	141		GO:0016705	oxidoreductase activity, acting on paired donors, with incorporation or reduction of molecular oxygen	molecular_function	5.8691e-65	1.2474e-61	139	1400		GO:0044436	thylakoid part	cellular_component	5.8211e-22	1.2372e-18	48	1073
GO:0042651	thylakoid membrane	cellular_component	4.6618e-20	7.4308e-17	38	322		GO:0009654	photosystem II oxygen evolving complex	cellular_component	2.2591e-24	3.6011e-21	35	165		GO:0071555	cell wall organization	biological_process	7.8536e-19	1.2519e-15	23	383		GO:0005506	iron ion binding	molecular_function	2.8982e-64	4.6198e-61	139	1435		GO:0009579	thylakoid	cellular_component	1.0622e-21	1.6931e-18	48	1089
GO:0009579	thylakoid	cellular_component	9.4719e-20	1.2079e-16	72	1089		GO:0015979	photosynthesis	biological_process	3.5918e-24	4.5803e-21	91	1143		GO:0045229	external encapsulating structure organization	biological_process	2.205e-18	2.8119e-15	23	398		GO:0016491	oxidoreductase activity	molecular_function	3.9477e-32	5.0342e-29	306	9406		GO:0034357	photosynthetic membrane	cellular_component	1.1327e-20	1.4445e-17	44	960
GO:0015979	photosynthesis	biological_process	3.8176e-19	4.0569e-16	72	1143		GO:0009579	thylakoid	cellular_component	7.3531e-24	7.8139e-21	89	1089		GO:0005506	iron ion binding	molecular_function	7.2404e-17	7.6941e-14	37	1435		GO:0055114	oxidation-reduction process	biological_process	4.2611e-27	4.5281e-24	297	9658		GO:0005199	structural constituent of cell wall	molecular_function	9.8227e-20	1.0438e-16	17	118
GO:0044436	thylakoid part	cellular_component	6.3746e-19	5.8063e-16	70	1073		GO:0044436	thylakoid part	cellular_component	1.5181e-22	1.3828e-19	86	1073		GO:0020037	heme binding	molecular_function	1.0896e-16	9.9248e-14	39	1624		GO:0071555	cell wall organization	biological_process	5.2692e-20	4.7995e-17	39	383		GO:0009654	photosystem II oxygen evolving complex	cellular_component	1.2247e-18	1.1155e-15	20	165
GO:0009664	plant-type cell wall organization	biological_process	7.5566e-19	6.0226e-16	23	136		GO:0020037	heme binding	molecular_function	2.473e-22	1.971e-19	102	1624		GO:0046906	tetrapyrrole binding	molecular_function	3.0638e-16	2.4418e-13	39	1672		GO:0045229	external encapsulating structure organization	biological_process	2.6737e-19	2.1309e-16	39	398		GO:0071555	cell wall organization	biological_process	4.7643e-18	3.7972e-15	26	383
GO:0071669	plant-type cell wall organization or biogenesis	biological_process	1.4998e-18	9.6717e-16	23	141		GO:0009521	photosystem	cellular_component	3.469e-22	2.2789e-19	74	832		GO:0016705	oxidoreductase activity, acting on paired donors, with incorporation or reduction of molecular oxygen	molecular_function	1.815e-15	1.2858e-12	35	1400		GO:0003824	catalytic activity	molecular_function	4.6504e-19	3.2946e-16	904	43669		GO:0009664	plant-type cell wall organization	biological_process	6.5363e-18	4.6306e-15	17	136
GO:0034357	photosynthetic membrane	cellular_component	1.5169e-18	9.6717e-16	65	960		GO:0034357	photosynthetic membrane	cellular_component	3.5741e-22	2.2789e-19	80	960		GO:0042546	cell wall biogenesis	biological_process	3.1979e-15	2.039e-12	19	341		GO:0005199	structural constituent of cell wall	molecular_function	1.0687e-18	6.8143e-16	21	118		GO:0071669	plant-type cell wall organization or biogenesis	biological_process	1.1225e-17	7.1571e-15	17	141
GO:0055114	oxidation-reduction process	biological_process	1.7551e-18	1.0173e-15	276	9658		GO:0046906	tetrapyrrole binding	molecular_function	2.5269e-21	1.4647e-18	102	1672		GO:0005618	cell wall	cellular_component	5.0689e-15	2.9381e-12	23	561		GO:0005618	cell wall	cellular_component	6.717e-17	3.8934e-14	43	561		GO:0045229	external encapsulating structure organization	biological_process	1.4768e-17	8.5603e-15	26	398
GO:0009521	photosystem	cellular_component	1.9212e-18	1.0208e-15	60	832		GO:0005506	iron ion binding	molecular_function	7.3438e-21	3.8797e-18	92	1435		GO:0071554	cell wall organization or biogenesis	biological_process	6.7708e-15	3.5975e-12	25	694		GO:0009664	plant-type cell wall organization	biological_process	1.6967e-16	9.0152e-14	21	136		GO:0005618	cell wall	cellular_component	1.5583e-16	8.28e-14	29	561
GO:0005506	iron ion binding	molecular_function	4.9391e-18	2.4224e-15	75	1435		GO:0042651	thylakoid membrane	cellular_component	7.9102e-21	3.8797e-18	43	322		GO:0016491	oxidoreductase activity	molecular_function	1.2792e-12	6.2741e-10	94	9406		GO:0071669	plant-type cell wall organization or biogenesis	biological_process	3.2642e-16	1.601e-13	21	141		GO:0030312	external encapsulating structure	cellular_component	2.9612e-14	1.4524e-11	34	961
GO:0005199	structural constituent of cell wall	molecular_function	1.2242e-17	5.5754e-15	20	118		GO:0003824	catalytic activity	molecular_function	5.81e-20	2.646e-17	1164	43669		GO:0030312	external encapsulating structure	cellular_component	4.7381e-11	2.1579e-08	24	961		GO:0044710	single-organism metabolic process	biological_process	3.1791e-15	1.4478e-12	529	23589		GO:0042651	thylakoid membrane	cellular_component	7.3059e-14	3.3273e-11	21	322
GO:0020037	heme binding	molecular_function	2.7409e-15	1.1651e-12	75	1624		GO:0044710	single-organism metabolic process	biological_process	1.1624e-19	4.941e-17	697	23589		GO:0055114	oxidation-reduction process	biological_process	3.4806e-10	1.4795e-07	89	9658		GO:0046914	transition metal ion binding	molecular_function	1.0433e-13	4.1575e-11	217	7764		GO:0009523	photosystem II	cellular_component	7.6989e-13	3.2725e-10	27	608
Sort by number of DEGs
Fruit vs root			DEG_list	1774				Fruit vs rhizome			DEG_list	2235				Fruit vs stem			DEG_list	492				Fruit vs leaf			DEG_list	1704				Fruit vs flower			DEG_list	742
GO_accession	Description	Term_type	Over_represented_pValue	Corrected_pValue	DEG_item	Bg_item		GO_accession	Description	Term_type	Over_represented_pValue	Corrected_pValue	DEG_item	Bg_item		GO_accession	Description	Term_type	Over_represented_pValue	Corrected_pValue	DEG_item	Bg_item		GO_accession	Description	Term_type	Over_represented_pValue	Corrected_pValue	DEG_item	Bg_item		GO_accession	Description	Term_type	Over_represented_pValue	Corrected_pValue	DEG_item	Bg_item
GO:0008152	metabolic process	biological_process	6.8417e-06	0.00069242	1032	54713		GO:0008152	metabolic process	biological_process	1.8735e-16	6.6363e-14	1369	54713		GO:0008152	metabolic process	biological_process	0.0011658	0.12388	294	54713		GO:0008152	metabolic process	biological_process	5.4927e-09	8.3385e-07	1012	54713		GO:0008152	metabolic process	biological_process	0.00016156	0.018543	441	54713
GO:0009987	cellular process	biological_process	0.88206	1	949	55914		GO:0009987	cellular process	biological_process	0.64678	1	1212	55914		GO:0003824	catalytic activity	molecular_function	2.4884e-09	9.9164e-07	273	43669		GO:0003824	catalytic activity	molecular_function	4.6504e-19	3.2946e-16	904	43669		GO:0009987	cellular process	biological_process	0.75969	1	395	55914
GO:0003824	catalytic activity	molecular_function	1.3743e-10	3.505e-08	890	43669		GO:0003824	catalytic activity	molecular_function	5.81e-20	2.646e-17	1164	43669		GO:0009987	cellular process	biological_process	0.5561	1	267	55914		GO:0005488	binding	molecular_function	0.19638	1	860	50395		GO:0003824	catalytic activity	molecular_function	6.4715e-06	0.00098244	375	43669
GO:0005488	binding	molecular_function	0.48009	1	888	50395		GO:0005488	binding	molecular_function	0.99455	1	1050	50395		GO:0005488	binding	molecular_function	0.072004	1	260	50395		GO:0009987	cellular process	biological_process	0.99991	1	852	55914		GO:0005488	binding	molecular_function	0.28262	1	375	50395
GO:0044699	single-organism process	biological_process	0.0097103	0.30499	759	40544		GO:0044699	single-organism process	biological_process	1.069e-08	1.7476e-06	1013	40544		GO:0044699	single-organism process	biological_process	1.6535e-05	0.0042172	241	40544		GO:0044699	single-organism process	biological_process	9.9877e-10	1.8195e-07	793	40544		GO:0044699	single-organism process	biological_process	0.24622	1	304	40544
GO:0071704	organic substance metabolic process	biological_process	0.96633	1	742	44722		GO:0071704	organic substance metabolic process	biological_process	0.35491	1	986	44722		GO:0071704	organic substance metabolic process	biological_process	0.64299	1	211	44722		GO:0071704	organic substance metabolic process	biological_process	0.92389	1	714	44722		GO:0044237	cellular metabolic process	biological_process	0.68278	1	295	41437
GO:0044237	cellular metabolic process	biological_process	0.67217	1	717	41437		GO:0044238	primary metabolic process	biological_process	0.58156	1	932	42838		GO:0044238	primary metabolic process	biological_process	0.67972	1	201	42838		GO:0044238	primary metabolic process	biological_process	0.97084	1	674	42838		GO:0071704	organic substance metabolic process	biological_process	0.98701	1	294	44722
GO:0044238	primary metabolic process	biological_process	0.94813	1	714	42838		GO:0044237	cellular metabolic process	biological_process	0.56237	1	906	41437		GO:0044237	cellular metabolic process	biological_process	0.8678	1	188	41437		GO:0044237	cellular metabolic process	biological_process	0.99988	1	618	41437		GO:0044238	primary metabolic process	biological_process	0.9908	1	279	42838
GO:0005623	cell	cellular_component	0.55232	1	555	31740		GO:0044710	single-organism metabolic process	biological_process	1.1624e-19	4.941e-17	697	23589		GO:1901363	heterocyclic compound binding	molecular_function	0.0035094	0.29243	163	28070		GO:1901363	heterocyclic compound binding	molecular_function	3.2468e-05	0.0024355	543	28070		GO:0005623	cell	cellular_component	0.046274	1	253	31740
GO:0044464	cell part	cellular_component	0.55232	1	555	31740		GO:0044763	single-organism cellular process	biological_process	0.30369	1	682	30267		GO:0097159	organic cyclic compound binding	molecular_function	0.00354	0.29243	163	28077		GO:0097159	organic cyclic compound binding	molecular_function	3.3216e-05	0.0024626	543	28077		GO:0044464	cell part	cellular_component	0.046274	1	253	31740
GO:0044710	single-organism metabolic process	biological_process	1.0826e-10	2.8761e-08	523	23589		GO:0043170	macromolecule metabolic process	biological_process	0.9998	1	649	32936		GO:0044710	single-organism metabolic process	biological_process	5.5629e-07	0.00017735	159	23589		GO:0044710	single-organism metabolic process	biological_process	3.1791e-15	1.4478e-12	529	23589		GO:0005622	intracellular	cellular_component	0.3705	1	216	28997
GO:1901363	heterocyclic compound binding	molecular_function	0.078966	1	521	28070		GO:0005623	cell	cellular_component	0.99644	1	641	31740		GO:0044763	single-organism cellular process	biological_process	0.23036	1	155	30267		GO:0043170	macromolecule metabolic process	biological_process	0.98831	1	508	32936		GO:0044424	intracellular part	cellular_component	0.27967	1	214	28234
GO:0097159	organic cyclic compound binding	molecular_function	0.07973	1	521	28077		GO:0044464	cell part	cellular_component	0.99644	1	641	31740		GO:0043170	macromolecule metabolic process	biological_process	0.93555	1	144	32936		GO:0044763	single-organism cellular process	biological_process	0.96281	1	476	30267		GO:1901363	heterocyclic compound binding	molecular_function	0.38609	1	208	28070
GO:0043170	macromolecule metabolic process	biological_process	0.99982	1	511	32936		GO:0006807	nitrogen compound metabolic process	biological_process	0.96078	1	623	30073		GO:0043167	ion binding	molecular_function	0.0077696	0.49539	140	24022		GO:0043167	ion binding	molecular_function	0.0037538	0.17219	450	24022		GO:0097159	organic cyclic compound binding	molecular_function	0.38744	1	208	28077
GO:0044763	single-organism cellular process	biological_process	0.94202	1	507	30267		GO:1901363	heterocyclic compound binding	molecular_function	0.80482	1	600	28070		GO:0005623	cell	cellular_component	0.94087	1	138	31740		GO:0006807	nitrogen compound metabolic process	biological_process	0.99895	1	445	30073		GO:0044710	single-organism metabolic process	biological_process	0.0010564	0.088626	207	23589
